# Supplementary material for: Honeybees disrupt the structure and functionality of plant-pollinator networks
Source: PubMed Central journal article supplement (PMC6423295; doi:10.1038/s41598-019-41271-5), 2019-03-18

1 Supplementary Information for

2  
3  
4  
5 **Honeybees disrupt the structure and functionality**  
6 **of plant-pollinator networks**

7  
8 **Alfredo Valido<sup>1,\*</sup>, María C. Rodríguez-Rodríguez and Pedro Jordano**

9  
10 Department of Integrative Ecology, Estación Biológica de Doñana (EBD-CSIC), C/ Americo

11 Vespucio 26, La Cartuja,

12 41092 Sevilla, Spain

13  
14 Telephone: +34 954466700

15 Fax: +34 954621125

16  
17 <sup>1</sup> Present address: Island Ecology and Evolution Research Group, Instituto de Productos  
18 Naturales y Agrobiología (IPNA-CSIC), C/ Astrofisico Francisco Sánchez 3, 38206 La  
19 Laguna, Tenerife, Canary Islands, Spain.

20  
21 \* e-mail: [avalido@ipna.csic.es](mailto:avalido@ipna.csic.es)

22

**Supplementary Table S1** List of pollinator species recorded during three consecutive springs in the Teide National Park (Tenerife, Canary Islands). In total, 99 pollinator species were recorded (81 in 2007, 60 in 2008, and 75 in 2009). # indicate species codes (V: Vertebrata; H: Hymenoptera; D: Diptera; L: Lepidoptera; C: Coleoptera). Plants indicate total number of plant species visited each.

| Order       | Family         | #   | Species                         | 2007 | 2008 | 2009 | Plants |
|-------------|----------------|-----|---------------------------------|------|------|------|--------|
| Reptiles    | Lacertidae     | V1  | <i>Gallotia galloti</i>         | 1    | 1    | 1    | 3      |
| Aves        | Sylviidae      | V2  | <i>Phylloscopus canariensis</i> | 1    | 1    | 1    | 1      |
| Aves        | Fringillidae   | V3  | <i>Serinus canarius</i>         | 1    | 1    | 1    | 1      |
| Hymenoptera | Anthophoridae  | H1  | <i>Amegilla quadrifasciata</i>  | 1    | -    | -    | 4      |
| Hymenoptera | Eumenidae      | H2  | <i>Ancistrocerus haematodes</i> | 1    | -    | -    | 2      |
| Hymenoptera | Andrenidae     | H3  | <i>Andrena chalcogastra</i>     | 1    | 1    | 1    | 11     |
| Hymenoptera | Andrenidae     | H4  | <i>Andrena lineolata</i>        | 1    | 1    | 1    | 16     |
| Hymenoptera | Megachilidae   | H5  | <i>Anthidium manicatum</i>      | 1    | -    | 1    | 3      |
| Hymenoptera | Anthophoridae  | H6  | <i>Anthophora alluaudi</i>      | 1    | 1    | 1    | 14     |
| Hymenoptera | Braconidae     | H7  | <i>Apanteles</i> sp.            | 1    | -    | -    | 1      |
| Hymenoptera | Apidae         | H8  | <i>Apis mellifera</i>           | 1    | 1    | 1    | 13     |
| Hymenoptera | Apidae         | H9  | <i>Bombus canariensis</i>       | 1    | 1    | 1    | 4      |
| Hymenoptera | Braconidae     | H10 | <i>Bracon</i> sp.               | 1    | 1    | 1    | 4      |
| Hymenoptera | Braconidae     | H11 | <i>Braconidae</i> sp.           | -    | 1    | 1    | 2      |
| Hymenoptera | Formicidae     | H12 | <i>Camponotus feai</i>          | -    | -    | 1    | 1      |
| Hymenoptera | Colletidae     | H13 | <i>Colletes dimidiatus</i>      | 1    | 1    | 1    | 11     |
| Hymenoptera | Formicidae     | H14 | <i>Crematogaster alluaudi</i>   | 1    | 1    | 1    | 8      |
| Hymenoptera | Ichneumonidae  | H15 | <i>Cryptus</i> sp.              | 1    | 1    | 1    | 4      |
| Hymenoptera | Megachilidae   | H16 | <i>Dioxys atlantica</i>         | 1    | -    | -    | 1      |
| Hymenoptera | Ichneumonidae  | H17 | <i>Dusona abdominalator</i>     | 1    | -    | 1    | 3      |
| Hymenoptera | Anthophoridae  | H18 | <i>Eucera gracilipes</i>        | 1    | 1    | 1    | 12     |
| Hymenoptera | Eupelmidae     | H19 | <i>Eupelmidae</i> sp.           | 1    | -    | -    | 1      |
| Hymenoptera | Gasteruptiidae | H20 | <i>Gasteruption canariae</i>    | 1    | -    | 1    | 5      |
| Hymenoptera | Colletidae     | H21 | <i>Hylaeus canariensis</i>      | 1    | 1    | 1    | 16     |
| Hymenoptera | Halictidae     | H22 | <i>Lasioglossum arctifrons</i>  | 1    | -    | -    | 10     |
| Hymenoptera | Halictidae     | H23 | <i>Lasioglossum loetum</i>      | 1    | 1    | 1    | 12     |
| Hymenoptera | Formicidae     | H24 | <i>Lasius grandis</i>           | -    | -    | 1    | 1      |
| Hymenoptera | Eumenidae      | H25 | <i>Leptochilus eatoni</i>       | 1    | 1    | -    | 3      |
| Hymenoptera | Megachilidae   | H26 | <i>Megachile canariensis</i>    | -    | -    | 1    | 2      |
| Hymenoptera | Anthophoridae  | H27 | <i>Melecta curvispina</i>       | 1    | 1    | 1    | 6      |
| Hymenoptera | Megachilidae   | H28 | <i>Osmia canaria</i>            | 1    | 1    | 1    | 15     |

| <b>Order</b>       | <b>Family</b>  | <b>#</b> | <b>Species</b>                  | <b>2007</b> | <b>2008</b> | <b>2009</b> | <b>#Plants</b> |
|--------------------|----------------|----------|---------------------------------|-------------|-------------|-------------|----------------|
| <b>Hymenoptera</b> | Formicidae     | H29      | <i>Plagiolepis barbara</i>      | 1           | 1           | 1           | 14             |
| <b>Hymenoptera</b> | Ichneumonidae  | H30      | <i>Temelucha decorata</i>       | 1           | -           | -           | 1              |
| <b>Lepidoptera</b> | Pieridae       | L1       | <i>Colias crocea</i>            | -           | 1           | -           | 1              |
| <b>Lepidoptera</b> | Lycaenidae     | L2       | <i>Cylyrius webbianus</i>       | 1           | 1           | 1           | 10             |
| <b>Lepidoptera</b> | Pieridae       | L3       | <i>Euchloe belemia</i>          | -           | 1           | -           | 1              |
| <b>Lepidoptera</b> | Geometridae    | L4       | <i>Eupithecia</i> sp.           | 1           | 1           | 1           | 5              |
| <b>Lepidoptera</b> | Lycaenidae     | L5       | <i>Lycaena phlaeas</i>          | 1           | -           | 1           | 7              |
| <b>Lepidoptera</b> | Sphingidae     | L6       | <i>Macroglossum stellatarum</i> | 1           | -           | -           | 1              |
| <b>Lepidoptera</b> | Pieridae       | L7       | <i>Pieris rapae</i>             | 1           | -           | -           | 3              |
| <b>Lepidoptera</b> | Nymphalidae    | L8       | <i>Vanessa cardui</i>           | -           | -           | 1           | 1              |
| <b>Diptera</b>     | Agromyzidae    | D1       | <i>Agromyzidae</i> sp.          | -           | -           | 1           | 1              |
| <b>Diptera</b>     | Bombyliidae    | D2       | <i>Anastoechus latifrons</i>    | 1           | -           | 1           | 2              |
| <b>Diptera</b>     | Bombyliidae    | D3       | <i>Anthrax anthrax</i>          | 1           | 1           | -           | 9              |
| <b>Diptera</b>     | Bibionidae     | D4       | <i>Bibio elmoi</i>              | 1           | 1           | 1           | 13             |
| <b>Diptera</b>     | Calliphoridae  | D5       | <i>Calliphora vicina</i>        | 1           | 1           | 1           | 10             |
| <b>Diptera</b>     | Tephritidae    | D6       | <i>Campiglossa reticulata</i>   | 1           | 1           | 1           | 3              |
| <b>Diptera</b>     | Mythicomyiidae | D7       | <i>Cephalodromia</i> sp.        | 1           | 1           | 1           | 15             |
| <b>Diptera</b>     | Chloropidae    | D8       | <i>Chloropidae</i> sp.          | 1           | 1           | 1           | 5              |
| <b>Diptera</b>     | Syrphidae      | D9       | <i>Chrysotoxum triarcuratum</i> | 1           | 1           | 1           | 3              |
| <b>Diptera</b>     | Mythicomyiidae | D10      | <i>Cyrtosia canariensis</i>     | 1           | 1           | 1           | 8              |
| <b>Diptera</b>     | Anthomyiidae   | D11      | <i>Delia</i> spp. (2 species)   | 1           | 1           | 1           | 8              |
| <b>Diptera</b>     | Bibionidae     | D12      | <i>Dilophus beckeri</i>         | 1           | 1           | 1           | 14             |
| <b>Diptera</b>     | Empididae      | D13      | <i>Empis basilaris</i>          | -           | 1           | -           | 1              |
| <b>Diptera</b>     | Syrphidae      | D14      | <i>Eristalis tenax</i>          | -           | 1           | 1           | 2              |
| <b>Diptera</b>     | Tachinidae     | D15      | <i>Estheria simonyi</i>         | 1           | 1           | 1           | 12             |
| <b>Diptera</b>     | Syrphidae      | D16      | <i>Eupeodes corollae</i>        | 1           | -           | -           | 5              |
| <b>Diptera</b>     | Bombyliidae    | D17      | <i>Exhyalanthrax simonae</i>    | -           | -           | 1           | 3              |
| <b>Diptera</b>     | Fanniidae      | D18      | <i>Fannia canicularis</i>       | 1           | -           | -           | 1              |
| <b>Diptera</b>     | Muscidae       | D19      | <i>Limnophora</i> sp.           | 1           | 1           | 1           | 5              |
| <b>Diptera</b>     | Agromyzidae    | D20      | <i>Liriomyza</i> sp.            | 1           | -           | -           | 1              |
| <b>Diptera</b>     | Calliphoridae  | D21      | <i>Lucilia sericata</i>         | 1           | 1           | 1           | 3              |
| <b>Diptera</b>     | Phoridae       | D22      | <i>Megaselia</i> sp.            | 1           | -           | -           | 1              |
| <b>Diptera</b>     | Sarcophagidae  | D23      | <i>Miltogramma aurifrons</i>    | 1           | -           | 1           | 5              |
| <b>Diptera</b>     | Muscidae       | D24      | <i>Musca domestica</i>          | -           | -           | 1           | 1              |
| <b>Diptera</b>     | Conopidae      | D25      | <i>Myopa mixta</i>              | 1           | 1           | -           | 2              |
| <b>Diptera</b>     | Sarcophagidae  | D26      | <i>Nyctia lugubris</i>          | 1           | 1           | 1           | 4              |
| <b>Diptera</b>     | Tachinidae     | D27      | <i>Peleteria ruficornis</i>     | 1           | 1           | 1           | 9              |

| <b>Order</b>      | <b>Family</b> | <b>#</b> | <b>Species</b>                     | <b>2007</b> | <b>2008</b> | <b>2009</b> | <b>#Plants</b> |
|-------------------|---------------|----------|------------------------------------|-------------|-------------|-------------|----------------|
| <b>Diptera</b>    | Muscidae      | D28      | <i>Phaonia sordidisquama</i>       | 1           | 1           | 1           | 4              |
| <b>Diptera</b>    | Conopidae     | D29      | <i>Physocephala biguttata</i>      | 1           | -           | -           | 2              |
| <b>Diptera</b>    | Tachinidae    | D30      | <i>Pseudogonia fasciata</i>        | -           | -           | 1           | 2              |
| <b>Diptera</b>    | Psychodidae   | D31      | <i>Psychodidae</i> sp.             | -           | -           | 1           | 1              |
| <b>Diptera</b>    | Tachinidae    | D32      | <i>Rondania insularis</i>          | 1           | 1           | 1           | 9              |
| <b>Diptera</b>    | Syrphidae     | D33      | <i>Scaeva albomaculata</i>         | 1           | 1           | 1           | 15             |
| <b>Diptera</b>    | Scatopsidae   | D34      | <i>Scatopsidae</i> sp.             | -           | -           | 1           | 2              |
| <b>Diptera</b>    | Sciaridae     | D35      | <i>Sciaridae</i> sp.               | 1           | -           | 1           | 4              |
| <b>Diptera</b>    | Tephritidae   | D36      | <i>Sphaeniscus filiulus</i>        | 1           | 1           | 1           | 3              |
| <b>Diptera</b>    | Syrphidae     | D37      | <i>Sphaerophoria scripta</i>       | -           | -           | 1           | 1              |
| <b>Diptera</b>    | Tachinidae    | D38      | <i>Tachina canariensis</i>         | 1           | 1           | 1           | 8              |
| <b>Diptera</b>    | Tephritidae   | D39      | <i>Tephritidae</i> sp.             | 1           | -           | -           | 1              |
| <b>Diptera</b>    | Therevidae    | D40      | <i>Thereva teydea</i>              | 1           | 1           | 1           | 3              |
| <b>Diptera</b>    | Sarcophagidae | D41      | <i>Wohlfahrtia bella</i>           | 1           | 1           | 1           | 8              |
| <b>Coleoptera</b> | Buprestidae   | C1       | <i>Acmaeodera cisti</i>            | 1           | 1           | 1           | 7              |
| <b>Coleoptera</b> | Scraptiidae   | C2       | <i>Anaspis proteus</i>             | 1           | 1           | 1           | 13             |
| <b>Coleoptera</b> | Buprestidae   | C3       | <i>Anthaxia fernandezi</i>         | 1           | 1           | 1           | 5              |
| <b>Coleoptera</b> | Dermestidae   | C4       | <i>Anthrenus minor</i>             | 1           | -           | 1           | 2              |
| <b>Coleoptera</b> | Malachiidae   | C5       | <i>Attalus aenescens</i>           | 1           | 1           | 1           | 17             |
| <b>Coleoptera</b> | Malachiidae   | C6       | <i>Attalus monticola</i>           | 1           | 1           | 1           | 9              |
| <b>Coleoptera</b> | Malachiidae   | C7       | <i>Attalus pellucidus</i>          | 1           | 1           | 1           | 13             |
| <b>Coleoptera</b> | Anthicidae    | C8       | <i>Aulacoderus scydmaenoides</i>   | 1           | -           | -           | 1              |
| <b>Coleoptera</b> | Bruchidae     | C9       | <i>Bruchidius lichenicola</i>      | 1           | -           | 1           | 7              |
| <b>Coleoptera</b> | Bruchidae     | C10      | <i>Bruchidius wollastoni</i>       | 1           | 1           | 1           | 6              |
| <b>Coleoptera</b> | Curculionidae | C11      | <i>Cionus griseus</i>              | 1           | -           | -           | 4              |
| <b>Coleoptera</b> | Chrysomelidae | C12      | <i>Cryptocephalus nitidicollis</i> | -           | 1           | 1           | 2              |
| <b>Coleoptera</b> | Dasytidae     | C13      | <i>Dasytes israelsoni</i>          | 1           | 1           | 1           | 16             |
| <b>Coleoptera</b> | Melyridae     | C14      | <i>Melyrosoma hirtum</i>           | 1           | 1           | 1           | 4              |
| <b>Coleoptera</b> | Staphylinidae | C15      | <i>Philorinum floricola</i>        | 1           | 1           | 1           | 3              |
| <b>Coleoptera</b> | Staphylinidae | C16      | <i>Staphylinidae</i> sp.           | 1           | -           | -           | 1              |
| <b>Coleoptera</b> | Curculionidae | C17      | <i>Tychius</i> sp.                 | -           | -           | 1           | 1              |



**Supplementary Table S2** Descriptive parameters of pollination networks in Teide National Park (Tenerife, Canary Islands) obtained throughout the three-years (2007-2009; and pooled all years), and for each experimental period per year in absence (*pre*-period) and massive presence (*apis*-period) of honeybees. In 2007, characterized by a practical absence of *A. mellifera*, we also set two temporal periods as control (*control-pre*, *control-apis*). For *Modularity* (M) and *number of modules* (*nM*) values are mean  $\pm$  SD after 50 runs. See details in Material & Methods.

|                                             | All years         | 2007               |                     | 2008              |                   | 2009             |                   |
|---------------------------------------------|-------------------|--------------------|---------------------|-------------------|-------------------|------------------|-------------------|
|                                             |                   | <i>control-pre</i> | <i>control-apis</i> | <i>pre-</i>       | <i>apis-</i>      | <i>pre-</i>      | <i>apis-</i>      |
| <i>N° of plant species (p)</i>              | 17                | 15                 | 16                  | 15                | 16                | 15               | 17                |
| <i>N° of pollinator species (a)</i>         | 99                | 65                 | 69                  | 52                | 44                | 64               | 51                |
| <i>Network size (M = a x p)</i>             | 1683              | 975                | 1104                | 780               | 704               | 960              | 867               |
| <i>N° of qualitative interactions</i>       | 545               | 266                | 262                 | 180               | 165               | 193              | 148               |
| <i>Connectance (C)</i>                      | 32.38             | 27.28              | 23.73               | 23.08             | 23.44             | 20.1             | 17.07             |
| <i>Nestedness (N)</i>                       | 29.44             | 19.79              | 19.86               | 19.39             | 23.41             | 21.39            | 20.23             |
| <i>Weighted nestedness (wNODF)</i>          | 30.87             | 30.79              | 21.8                | 28.19             | 22.71             | 17.81            | 14.71             |
| <i>Interaction strength asymmetry (ISA)</i> | 0.10              | 0.72               | 0.71                | 0.74              | 0.71              | 0.69             | 0.69              |
| <i>Linkage density (LD)</i>                 | 6.86              | 5.93               | 5.04                | 4.82              | 4.01              | 4.27             | 3.18              |
| <i>Shannon diversity (H')</i>               | 4.50              | 4.27               | 4.29                | 3.91              | 3.53              | 3.79             | 3.40              |
| <i>Modularity (M)</i>                       | 0.428 $\pm$ 0.039 | 0.325 $\pm$ 0.089  | 0.477 $\pm$ 0.047   | 0.373 $\pm$ 0.046 | 0.434 $\pm$ 0.026 | 0.314 $\pm$ 0.08 | 0.474 $\pm$ 0.089 |
| <i>N° of modules (nM)</i>                   | 6.4 $\pm$ 0.9     | 4 $\pm$ 0.7        | 5.7 $\pm$ 0.6       | 4.6 $\pm$ 0.6     | 5.5 $\pm$ 0.8     | 4.1 $\pm$ 1      | 5.1 $\pm$ 0.8     |

**Supplementary Table S3A** Descriptive data of 5-min censuses under absence (*pre*-periods) and massive presence (*apis*-periods) of honeybees during three consecutive springs in Teide National Park (Tenerife, Canary Islands). In 2007, when *A. mellifera* was practically absent throughout the spring in our study plot, we set two temporal periods as control (*control-pre*, *control-apis*; see details in Material & Methods). The total number of interactions recorded (and percentage respect to the total for each year) is indicated per period.

|                                                         | 2007               |                     | 2008         |              | 2009        |              |
|---------------------------------------------------------|--------------------|---------------------|--------------|--------------|-------------|--------------|
|                                                         | <i>control-pre</i> | <i>control-apis</i> | <i>pre-</i>  | <i>apis-</i> | <i>pre-</i> | <i>apis-</i> |
| <i>Time span sampled</i>                                | 30 April-8May      | 9-16 May            | 1-10 May     | 12-21 May    | 2-14 May    | 18-28 May    |
| <i>N° plant species (p)</i>                             | 15                 | 16                  | 15           | 16           | 15          | 17           |
| <i>N° pollinator species (a)</i>                        | 65                 | 69                  | 52           | 44           | 64          | 51           |
| <i>Species richness (S= a + p)</i>                      | 80                 | 85                  | 67           | 60           | 79          | 68           |
| <i>N° of individual plants censused</i>                 | 128                | 151                 | 114          | 114          | 129         | 133          |
| <i>Coincidence of individual plants between periods</i> |                    | 55%                 |              | 80%          |             | 58%          |
| <i>Total n° 5-min censuses realized</i>                 | 1405               | 1385                | 1372         | 1395         | 1590        | 900          |
| <i>Total n° quantitative interactions (5-min)</i>       | 3678               | 4218                | 4127         | 4425         | 3654        | 2257         |
| <i>by Vertebrates (%)</i>                               | 6 (0.2)            | 1 (0.02)            | 17 (0.41)    | 28 (0.6)     | 10 (0.3)    | 1 (0.04)     |
| <i>by Apis mellifera (%)</i>                            | 184 (5)            | 209 (4.9)           | 16 (0.39)    | 910 (20.6)   | 10 (0.3)    | 759 (33.63)  |
| <i>by rest Hymenoptera (%)</i>                          | 1859 (50.5)        | 1789 (42.4)         | 1748 (42.36) | 1092 (24.7)  | 1371(37.5)  | 317 (14.05)  |
| <i>by Diptera (%)</i>                                   | 818 (22.2)         | 1224 (29)           | 309 (7.49)   | 294 (6.6)    | 653 (17.8)  | 409 (18.12)  |
| <i>by Coleoptera (%)</i>                                | 791 (21.5)         | 743 (17.6)          | 2033 (49.26) | 2101 (47.5)  | 1599 (43.8) | 770 (34.12)  |
| <i>by Lepidoptera (%)</i>                               | 20 (0.5)           | 252 (5.9)           | 4 (0.09)     | 0            | 11 (0.3)    | 1 (0.04)     |

**Supplementary Table S3-B** Descriptive data of vertebrate ‘spot-censuses’ done on 10 individual plants of *Echium wildpretii* (Boraginaceae) during three consecutive springs in Teide National Park (Tenerife, Canary Islands). Vertebrate pollinators included a lacertid lizard (*Gallotia galloti*), and two passerine birds (*Phylloscopus canariensis* and *Serinus canarius*). Data from 2008 and 2009 are separated into two temporal periods related to the absence (*pre*-periods) or massive presence (*apis*-periods) of honeybees. In 2007, when *A. mellifera* was practically absent throughout the spring in our study site, we differentiated two temporal periods as control (*control-pre*, *control-apis*; see details in Material & Methods).

|                                                             | 2007               |                     | 2008        |              | 2009        |              |
|-------------------------------------------------------------|--------------------|---------------------|-------------|--------------|-------------|--------------|
|                                                             | <i>control-pre</i> | <i>control-apis</i> | <i>pre-</i> | <i>apis-</i> | <i>pre-</i> | <i>apis-</i> |
| <i>Total n° spot-census realized</i>                        | 179                | 117                 | 288         | 332          | 204         | 235          |
| <i>Total n° interactions with G. galloti</i>                | 13                 | 109                 | 144         | 7            | 74          | 15           |
| <i>Total n° interactions with P. canariensis</i>            | 7                  | 5                   | 25          | 3            | 26          | 0            |
| <i>Total n° interactions with S. canarius</i>               | 0                  | 0                   | 24          | 1            | 4           | 3            |
| <i>Total n° interactions with birds</i>                     | 7                  | 5                   | 49          | 4            | 30          | 3            |
| <i>Total n° interactions with vertebrates</i>               | 20                 | 114                 | 193         | 11           | 104         | 18           |
| <i>Vertebrate visit rate (mean ± SD)</i>                    | 0.13 ± 0.41        | 0.97 ± 1.34         | 0.67 ± 1.1  | 0.03 ± 0.2   | 0.51 ± 0.75 | 0.08 ± 0.28  |
| <i>N° individual plants</i>                                 | 10                 | 10                  | 10          | 10           | 10          | 10           |
| <i>Coincidence of individual plants between periods (%)</i> | 100                |                     | 100         |              | 100         |              |

**Supplementary Table S4** Number of pollinator species registered on each plant species during three consecutive springs in Teide National Park (Tenerife, Canary Islands) under the absence (*pre*-period) and massive presence (*apis*-period) of honeybees (2008-2009 springs). For 2007, characterized by a practical absence of *A. mellifera* in our study plot, we distinguished two temporal periods as control (*control-pre*, *control-apis*; see details in Methods on Electronic Supplementary Material). The percentage of recorded species respect to the total for each year (81 in 2007; 60 in 2008; 75 in 2009; Table S1, Supporting Information) is indicated between brackets. ‘#pollinators’ indicates the accumulated number of recorded species per plant species through the three studied years.

|                                                 | 2007               |                     | 2008        |              | 2009        |              | #pollinators |
|-------------------------------------------------|--------------------|---------------------|-------------|--------------|-------------|--------------|--------------|
|                                                 | <i>control-pre</i> | <i>control-apis</i> | <i>pre-</i> | <i>apis-</i> | <i>pre-</i> | <i>apis-</i> |              |
| <i>Adenocarpus viscosus</i> (Fabaceae)          | 23 (30.8)          | 15 (22.1)           | 5 (8.3)     | 9 (15)       | 13 (20.3)   | 9 (18)       | 29           |
| <i>Argyranthemum tenerifae</i> (Asteraceae)     | 26 (41.5)          | -                   | 22 (36.7)   | 11 (18.3)    | 18 (28.1)   | 10 (20)      | 41           |
| <i>Bituminaria bituminosa</i> (Fabaceae)        | 5 (7.7)            | 6 (8.8)             | 10 (16.7)   | 9 (15)       | 7 (10.9)    | 4 (8)        | 19           |
| <i>Chamaecytisus proliferus</i> (Fabaceae)      | 19 (15.4)          | 16 (23.5)           | 1 (1.7)     | -            | 13 (28.1)   | 8 (6)        | 29           |
| <i>Cistus symphytifolius</i> (Cistaceae)        | 22 (9.2)           | 22 (32.4)           | -           | 14 (23.3)    | -           | 7 (14)       | 29           |
| <i>Descurainia bourgeauana</i> (Brassicaceae)   | 26 (29.2)          | 21 (30.9)           | 17 (28.3)   | 12 (20)      | 24 (37.5)   | 19 (38)      | 42           |
| <i>Echium wildpretii</i> (Boraginaceae)         | 32 (33.9)          | 29 (42.7)           | 13 (21.7)   | 9 (15)       | 10 (20.3)   | 7 (14)       | 36           |
| <i>Erysimum scoparium</i> (Brassicaceae)        | 31 (44.6)          | 24 (35.3)           | 17 (28.3)   | 17 (28.3)    | 16 (25)     | 11 (22)      | 40           |
| <i>Lotus campylocladus</i> (Fabaceae)           | 19 (29.2)          | 5 (7.4)             | 12 (20)     | 8 (13.3)     | 10 (15.6)   | 7 (14)       | 29           |
| <i>Nepeta teydea</i> (Lamiaceae)                | 26 (33.9)          | 20 (29.4)           | 15 (25)     | 10 (16.7)    | 15 (23.4)   | 9 (18)       | 38           |
| <i>Pimpinella cumbrae</i> (Apiaceae)            | -                  | 21 (30.9)           | -           | 3 (5)        | -           | 6 (12)       | 27           |
| <i>Pterocephalus lasiospermus</i> (Dipsacaceae) | -                  | 24 (35.3)           | 5 (8.3)     | 8 (13.3)     | 7 (10.9)    | 11 (22)      | 38           |
| <i>Rhamnus integrifolia</i> (Rhamnaceae)        | 22 (33.9)          | 7 (10.3)            | 19 (31.7)   | 13 (21.7)    | 13 (20.3)   | 15 (30)      | 39           |
| <i>Scrophularia glabrata</i> (Scrophulariaceae) | 14 (21.5)          | 10 (14.7)           | 6 (10)      | 3 (5)        | 10 (15.6)   | 4 (8)        | 23           |
| <i>Silene vulgaris</i> (Caryophyllaceae)        | 4 (6.2)            | 1 (1.5)             | 6 (10)      | 7 (11.7)     | 4 (6.3)     | 2 (4)        | 12           |
| <i>Spartocytisus supranubius</i> (Fabaceae)     | 37 (56.9)          | 30 (44.1)           | 27 (45)     | 22(36.7)     | 31 (48.4)   | 12 (24)      | 53           |
| <i>Tolpis webbii</i> (Asteraceae)               | 10 (15.4)          | 12 (17.7)           | 5 (8.3)     | 10 (16.7)    | 2 (3.1)     | 7 (14)       | 21           |

**Supplementary Table S5** Difference in the participation coefficient ( $\Delta c$ ) and within-module degree ( $\Delta z$ ) between *pre*- and *apis*-periods (*pre*- minus *apis*-) per pollinator species. Topological values were calculated from 2008-2009 combined data. Positive values indicate species with higher role connecting among (*c*) or within (*z*) modules through *pre*-periods. Pollinator species are group by order, except for Vertebrate. Within each order, species are sorted by decreasing  $\Delta c$  values. Species in boldface showed significantly lower *c* values under the presence of honeybees (*apis*-period) by using binomial test (see details in Material & Methods). See also figures 2 (maintext) and S5 (Supporting Information).

| <b>Order</b>       | <b>#</b>   | <b>Pollinator species</b>          | <b><math>\Delta c</math> (pre - apis)</b> | <b><math>\Delta z</math> (pre-apis)</b> |
|--------------------|------------|------------------------------------|-------------------------------------------|-----------------------------------------|
| Vert-Aves          | V2         | <i>Phylloscopus canariensis</i>    | 0.0000000                                 | -0.1937539                              |
| Vert-Aves          | V3         | <i>Serinus canarius</i>            | 0.0000000                                 | -0.8270403                              |
| Vert-Rept          | V1         | <i>Gallotia galloti</i>            | -0.3383838                                | 0.0218467                               |
| <b>Hymenoptera</b> | <b>H3</b>  | <b><i>Andrena chalcogastra</i></b> | <b>0.3503788</b>                          | <b>1.6732471</b>                        |
| <b>Hymenoptera</b> | <b>H27</b> | <b><i>Melecta curvispina</i></b>   | <b>0.1994949</b>                          | <b>0.2669159</b>                        |
| <b>Hymenoptera</b> | <b>H11</b> | <b><i>Braconidae sp.</i></b>       | <b>0.1969697</b>                          | <b>0.2472353</b>                        |
| <b>Hymenoptera</b> | <b>H9</b>  | <b><i>Bombus canariensis</i></b>   | <b>0.1111111</b>                          | <b>0.2096559</b>                        |
| <b>Hymenoptera</b> | <b>H28</b> | <b><i>Osmia canaria</i></b>        | <b>0.1054924</b>                          | <b>-0.2639167</b>                       |
| <b>Hymenoptera</b> | <b>H13</b> | <b><i>Colletes dimidiatus</i></b>  | <b>0.0740741</b>                          | <b>-0.2120282</b>                       |
| Hymenoptera        | H1         | <i>Amegilla quadrifasciata</i>     | 0.0000000                                 | 0.0000000                               |
| Hymenoptera        | H2         | <i>Ancistrocerus haematodes</i>    | 0.0000000                                 | 0.0000000                               |
| Hymenoptera        | H5         | <i>Anthidium manicatum</i>         | 0.0000000                                 | -0.8270403                              |
| Hymenoptera        | H7         | <i>Apanteles sp.</i>               | 0.0000000                                 | 0.0000000                               |
| Hymenoptera        | H12        | <i>Camponotus feai</i>             | 0.0000000                                 | -0.6502496                              |
| Hymenoptera        | H16        | <i>Dioxys atlantica</i>            | 0.0000000                                 | 0.0000000                               |
| Hymenoptera        | H17        | <i>Dusona abdominalator</i>        | 0.0000000                                 | 0.0000000                               |
| Hymenoptera        | H19        | <i>Eupelmidae sp.</i>              | 0.0000000                                 | 0.0000000                               |
| Hymenoptera        | H20        | <i>Gasteruption canariae</i>       | 0.0000000                                 | 0.6543169                               |
| Hymenoptera        | H22        | <i>Lasioglossum arcifrons</i>      | 0.0000000                                 | 0.0000000                               |
| Hymenoptera        | H24        | <i>Lasius grandis</i>              | 0.0000000                                 | 0.6334324                               |
| Hymenoptera        | H30        | <i>Temelucha decorata</i>          | 0.0000000                                 | 0.0000000                               |

|                    |            |                                     |                  |                   |
|--------------------|------------|-------------------------------------|------------------|-------------------|
| Hymenoptera        | H6         | <i>Anthophora alluaudi</i>          | -0.0150182       | -0.0134454        |
| Hymenoptera        | H21        | <i>Hylaeus canariensis</i>          | -0.0396868       | -0.1887345        |
| Hymenoptera        | H18        | <i>Eucera gracilipes</i>            | -0.0783839       | 0.1211488         |
| Hymenoptera        | H29        | <i>Plagiolepis barbara</i>          | -0.1000289       | -0.1288708        |
| Hymenoptera        | H4         | <i>Andrena lineolata</i>            | -0.1198653       | 1.1256574         |
| Hymenoptera        | H8         | <i>Apis mellifera</i>               | -0.1733044       | -2.6620538        |
| Hymenoptera        | H26        | <i>Megachile canariensis</i>        | -0.1818182       | 0.1788711         |
| Hymenoptera        | H23        | <i>Lasioglossum loetum</i>          | -0.2571892       | 0.9067189         |
| Hymenoptera        | H14        | <i>Crematogaster alluaudi</i>       | -0.2777778       | 0.1851121         |
| Hymenoptera        | H10        | <i>Bracon sp.</i>                   | -0.3383838       | -0.2617168        |
| Hymenoptera        | H15        | <i>Cryptus sp.</i>                  | -0.4826038       | -0.2492729        |
| Hymenoptera        | H25        | <i>Leptochilus eatoni</i>           | -0.5028058       | 0.4329302         |
| <b>Lepidoptera</b> | <b>L4</b>  | <b><i>Eupithecia sp.</i></b>        | <b>0.3344557</b> | <b>-0.5239186</b> |
| Lepidoptera        | L1         | <i>Colias crocea</i>                | 0.0000000        | -0.7524770        |
| Lepidoptera        | L3         | <i>Euchloe belemia</i>              | 0.0000000        | -0.8078621        |
| Lepidoptera        | L5         | <i>Lycaena phlaeas</i>              | 0.0000000        | -0.8078621        |
| Lepidoptera        | L6         | <i>Macroglossum stellatarum</i>     | 0.0000000        | 0.0000000         |
| Lepidoptera        | L7         | <i>Pieris rapae</i>                 | 0.0000000        | 0.0000000         |
| Lepidoptera        | L8         | <i>Vanessa cardui</i>               | 0.0000000        | 0.0000000         |
| Lepidoptera        | L2         | <i>Cyclyrius webbianus</i>          | -0.1414142       | 0.2425584         |
| <b>Diptera</b>     | <b>D8</b>  | <b><i>Chloropidae sp</i></b>        | <b>0.4654545</b> | <b>0.9328732</b>  |
| <b>Diptera</b>     | <b>D12</b> | <b><i>Dilophus beckeri</i></b>      | <b>0.4511785</b> | <b>1.2349121</b>  |
| <b>Diptera</b>     | <b>D28</b> | <b><i>Phaonia sordidisquama</i></b> | <b>0.4419192</b> | <b>0.1192948</b>  |
| <b>Diptera</b>     | <b>D5</b>  | <b><i>Calliphora vicina</i></b>     | <b>0.1400742</b> | <b>1.3357965</b>  |
| <b>Diptera</b>     | <b>D19</b> | <b><i>Limnophora sp.</i></b>        | <b>0.1374859</b> | <b>-0.0003736</b> |
| <b>Diptera</b>     | <b>D15</b> | <b><i>Estheria simonyi</i></b>      | <b>0.1146885</b> | <b>0.4950113</b>  |
| <b>Diptera</b>     | <b>D7</b>  | <b><i>Cephalodromia sp.</i></b>     | <b>0.0829649</b> | <b>-1.6934254</b> |
| <b>Diptera</b>     | <b>D41</b> | <b><i>Wohlfahrtia bella</i></b>     | <b>0.0050505</b> | <b>-0.6032783</b> |
| Diptera            | D1         | <i>Agromyzidae sp.</i>              | 0.0000000        | 0.0000000         |
| Diptera            | D2         | <i>Anastoechus latifrons</i>        | 0.0000000        | 0.0000000         |
| Diptera            | D9         | <i>Chrysotoxum triarquatatum</i>    | 0.0000000        | -0.0277687        |
| Diptera            | D13        | <i>Empis basilaris</i>              | 0.0000000        | 0.6332864         |
| Diptera            | D16        | <i>Eupeodes corollae</i>            | 0.0000000        | 0.0000000         |
| Diptera            | D18        | <i>Fannia canicularis</i>           | 0.0000000        | 0.0000000         |
| Diptera            | D20        | <i>Liriomyza sp.</i>                | 0.0000000        | 0.0000000         |
| Diptera            | D22        | <i>Megaselia sp.</i>                | 0.0000000        | 0.0000000         |
| Diptera            | D24        | <i>Musca domestica</i>              | 0.0000000        | 0.7223893         |
| Diptera            | D25        | <i>Myopa mixta</i>                  | 0.0000000        | -0.7973289        |

|                   |            |                                           |                  |                   |
|-------------------|------------|-------------------------------------------|------------------|-------------------|
| Diptera           | D29        | <i>Physocephala biguttata</i>             | 0.0000000        | 0.0000000         |
| Diptera           | D31        | <i>Psychodidae sp.</i>                    | 0.0000000        | 0.0000000         |
| Diptera           | D35        | <i>Sciaridae sp.</i>                      | 0.0000000        | -0.9199442        |
| Diptera           | D36        | <i>Sphaeniscus filiulus</i>               | 0.0000000        | -0.7224066        |
| Diptera           | D37        | <i>Sphaerophoria scripta</i>              | 0.0000000        | -0.9240375        |
| Diptera           | D39        | <i>Tephritidae sp.</i>                    | 0.0000000        | 0.0000000         |
| Diptera           | D33        | <i>Scaeva albomaculata</i>                | -0.0098773       | 1.6516677         |
| Diptera           | D10        | <i>Cyrtosia canariensis</i>               | -0.0661637       | -1.0385188        |
| Diptera           | D6         | <i>Campiglossa reticulata</i>             | -0.0858586       | -0.2686548        |
| Diptera           | D17        | <i>Exhyalanthrax simonae</i>              | -0.0909091       | -0.4275282        |
| Diptera           | D34        | <i>Scatopsidae sp.</i>                    | -0.1060606       | 0.3585458         |
| Diptera           | D3         | <i>Anthrax anthrax</i>                    | -0.1167228       | -0.0072875        |
| Diptera           | D11        | <i>Delia spp (2 species)</i>              | -0.1201796       | -1.0012273        |
| Diptera           | D21        | <i>Lucilia sericata</i>                   | -0.1313131       | -0.0841964        |
| Diptera           | D40        | <i>Thereva teydea</i>                     | -0.1795735       | -0.8145835        |
| Diptera           | D4         | <i>Bibio elmoi</i>                        | -0.1993547       | -1.1186693        |
| Diptera           | D27        | <i>Peleteria ruficornis</i>               | -0.2111111       | 0.5868842         |
| Diptera           | D23        | <i>Miltogramma aurifrons</i>              | -0.2878788       | -0.5002055        |
| Diptera           | D30        | <i>Pseudogonia fasciata</i>               | -0.2878788       | 0.3071132         |
| Diptera           | D26        | <i>Nyctia lugubris</i>                    | -0.3131313       | -0.1763092        |
| Diptera           | D38        | <i>Tachina canariensis</i>                | -0.3243547       | -0.3372174        |
| Diptera           | D14        | <i>Eristalis tenax</i>                    | -0.4848485       | 0.6164558         |
| Diptera           | D32        | <i>Rondania insularis</i>                 | -0.6313131       | -0.5300534        |
| <b>Coleoptera</b> | <b>C12</b> | <b><i>Cryptocephalus nitidicollis</i></b> | <b>0.4747475</b> | <b>-0.5089971</b> |
| <b>Coleoptera</b> | <b>C6</b>  | <b><i>Attalus monticola</i></b>           | <b>0.4468687</b> | <b>1.6764419</b>  |
| <b>Coleoptera</b> | <b>C9</b>  | <b><i>Bruchidius lichenicola</i></b>      | <b>0.3344557</b> | <b>-0.2907843</b> |
| Coleoptera        | C4         | <i>Anthrenus minor</i>                    | 0.0000000        | 0.6543169         |
| Coleoptera        | C8         | <i>Aulacoderus scydmaenoides</i>          | 0.0000000        | 0.0000000         |
| Coleoptera        | C11        | <i>Cionus griseus</i>                     | 0.0000000        | 0.0000000         |
| Coleoptera        | C16        | <i>Staphylinidae sp.</i>                  | 0.0000000        | 0.0000000         |
| Coleoptera        | C17        | <i>Tychius sp.</i>                        | 0.0000000        | 0.0000000         |
| Coleoptera        | C2         | <i>Anaspis proteus</i>                    | -0.0029306       | 1.3114811         |
| Coleoptera        | C3         | <i>Anthaxia fernandezi</i>                | -0.0112234       | 0.0658528         |
| Coleoptera        | C7         | <i>Attalus pellucidus</i>                 | -0.0233972       | 1.7058109         |
| Coleoptera        | C13        | <i>Dasytes israelsoni</i>                 | -0.0275761       | -0.4417457        |
| Coleoptera        | C5         | <i>Attalus aenescens</i>                  | -0.0447531       | 1.2445736         |
| Coleoptera        | C1         | <i>Acmaeodera cisti</i>                   | -0.0576599       | 0.0020713         |
| Coleoptera        | C10        | <i>Bruchidius wollastoni</i>              | -0.1691919       | 0.4180418         |

|            |     |                            |            |            |
|------------|-----|----------------------------|------------|------------|
| Coleoptera | C15 | <i>Phlorinum floricola</i> | -0.4040404 | -0.2198068 |
| Coleoptera | C14 | <i>Melyrosoma hirtum</i>   | -0.4646465 | -0.4114923 |

---



1 **Supplementary Figure S1** Representation of cumulative number of pollinator species  
2 recorded for each experimental period (*pre*- and *apis*-periods) and year in Teide National Park  
3 (Tenerife, Canary Islands) in 2007 (*control*-year) and 2008 and 2009 (*experimental*-years), in  
4 relation to increasing sampling effort. According to this, the sampling effort realised was  
5 sufficient to robustly characterise the number of pollinators for each experimental period and  
6 year (see also tables S1, S2 and S3 for the species list and number of pollination interactions  
7 recorded for each period and year).

8  
9 **Supplementary Figure S2** Pollination networks in Teide National Park (Tenerife, Canary  
10 Islands) obtained in the *control*- (2007; A) and *experimental*-years (2008; B) (2009; C). The  
11 box size corresponds to the total number of flower visits recorded per pollinator species. Link  
12 width represents the frequency of observed interactions. Honeybees, and its interactions, are  
13 indicated in red. See species identities in Table S1.

14  
15 **Supplementary Figure S3** Observed values for each network parameter ( $C$ ,  $N$ ,  $wNODF$ ,  $ISA$ ,  
16  $H'$ ,  $LD$ ) regarding the difference between the *pre*- and *apis*-period values (red line), compared  
17 with the frequency distribution of the differences found in the randomized resamplings ( $N=$   
18 5000) of the adjacency matrices for the two combined *experimental*-years (2008-2009; A),  
19 and for each year separately (2007; B), (2008; C), (2009; D). The significance values for the  
20  $z$ -score transformed values of the differences are also included.

21  
22 **Supplementary Figure S4** Detected modules for each experimental period (*pre*- and *apis*-  
23 periods) and years (2007; A), (2008; B), (2009; C) and *experimental*-years combined (2008-

1 2009; D). Species are sorted according to their modular position, plants as rows and  
2 pollinators as columns. Darker squares indicate more frequent interactions.  
3  
4 **Supplementary Figure S5** Changes in the topological role of pollinator species, pooled by  
5 Order (A) and species (B) for the *control*-year (2007) and experimental-years separately  
6 (2008, 2009) and combined (2008-2009), connecting across (*c coefficient*) and within (*z-*  
7 *score*) modules from *pre-* to *apis-*periods. H: Hymenoptera; C: Coleoptera; D: Diptera; R:  
8 Reptiles; L: Lepidoptera; A: Aves. See species identities in Table S1 and results per pollinator  
9 species in Supplementary. The significant displacements of hub bee species (*A. chalcogastra*,  
10 *C. dimidiatus*, *M. curvispina*, and *O. canaria*) positions on the *c-z* bivariate plane are also  
11 indicated. See also Table S5.

12  
13 **Supplementary Figure S6** Rank ordered eigenvalues of the adjacency matrices for the 2008  
14 and 2009 seasons separately (left). The largest eigenvalue of the matrix is known as its  
15 spectral radius; we obtained the 95% confidence intervals (bars) for eigenvalues by  
16 resampling the raw interaction matrix of individual plant data. Blue, *pre*-period; red, *apis*-  
17 period. Right panels show the spectral graphs of the adjacency matrices for the *pre*- (blue) and  
18 *apis*- (red) periods. The spectra are symmetric about the origin because the adjacency matrix  
19 of a binary bipartite graph with  $|S|$  nodes has  $|S|$  eigenvalues<sup>63</sup>.

20  
21 **Supplementary Figure S7 (A)** Variation in the number of seeds per fruit of *Spartocytisus*  
22 *supranubius* (Fabaceae) (N= 10,626 fruits from 219 individual plants) along a distance to  
23 nearest apiary gradient in Teide National Park (Tenerife, Canary Islands). The numbers of  
24 individual plants used per distance class are: 60 (0 m), 45 (100 m), 30 (500 m), 34 (1000 m),  
25 19 (2000), and 31 (4000 m). Significant statistical differences among distances are  
26 represented by different subscript letters (GLM with Poisson error family). (B) Individual

1 seed mass of *S. supranubius* (N= 2838 fruits from 68 individual plants) along a distance to  
2 nearest apiary gradient. The number of individual plants used per distance class are: 15 (0 m),  
3 10 (100 m), 10 (500 m), 9 (1000 m), 14 (2000), and 10 (4000 m). Significant statistical  
4 differences among distances are represented by different subscript letters (GLM with log  
5 transformation and using number of seeds per fruit as covariate). Data from fruits belonging  
6 to the same individual plant were averaged.

7

8 **Supplementary Figure S8** Distribution of apiaries and the studied plot, within Teide  
9 National Park (Tenerife)<sup>44-45</sup>. Map data: Google Earth, Grafcan (2018).

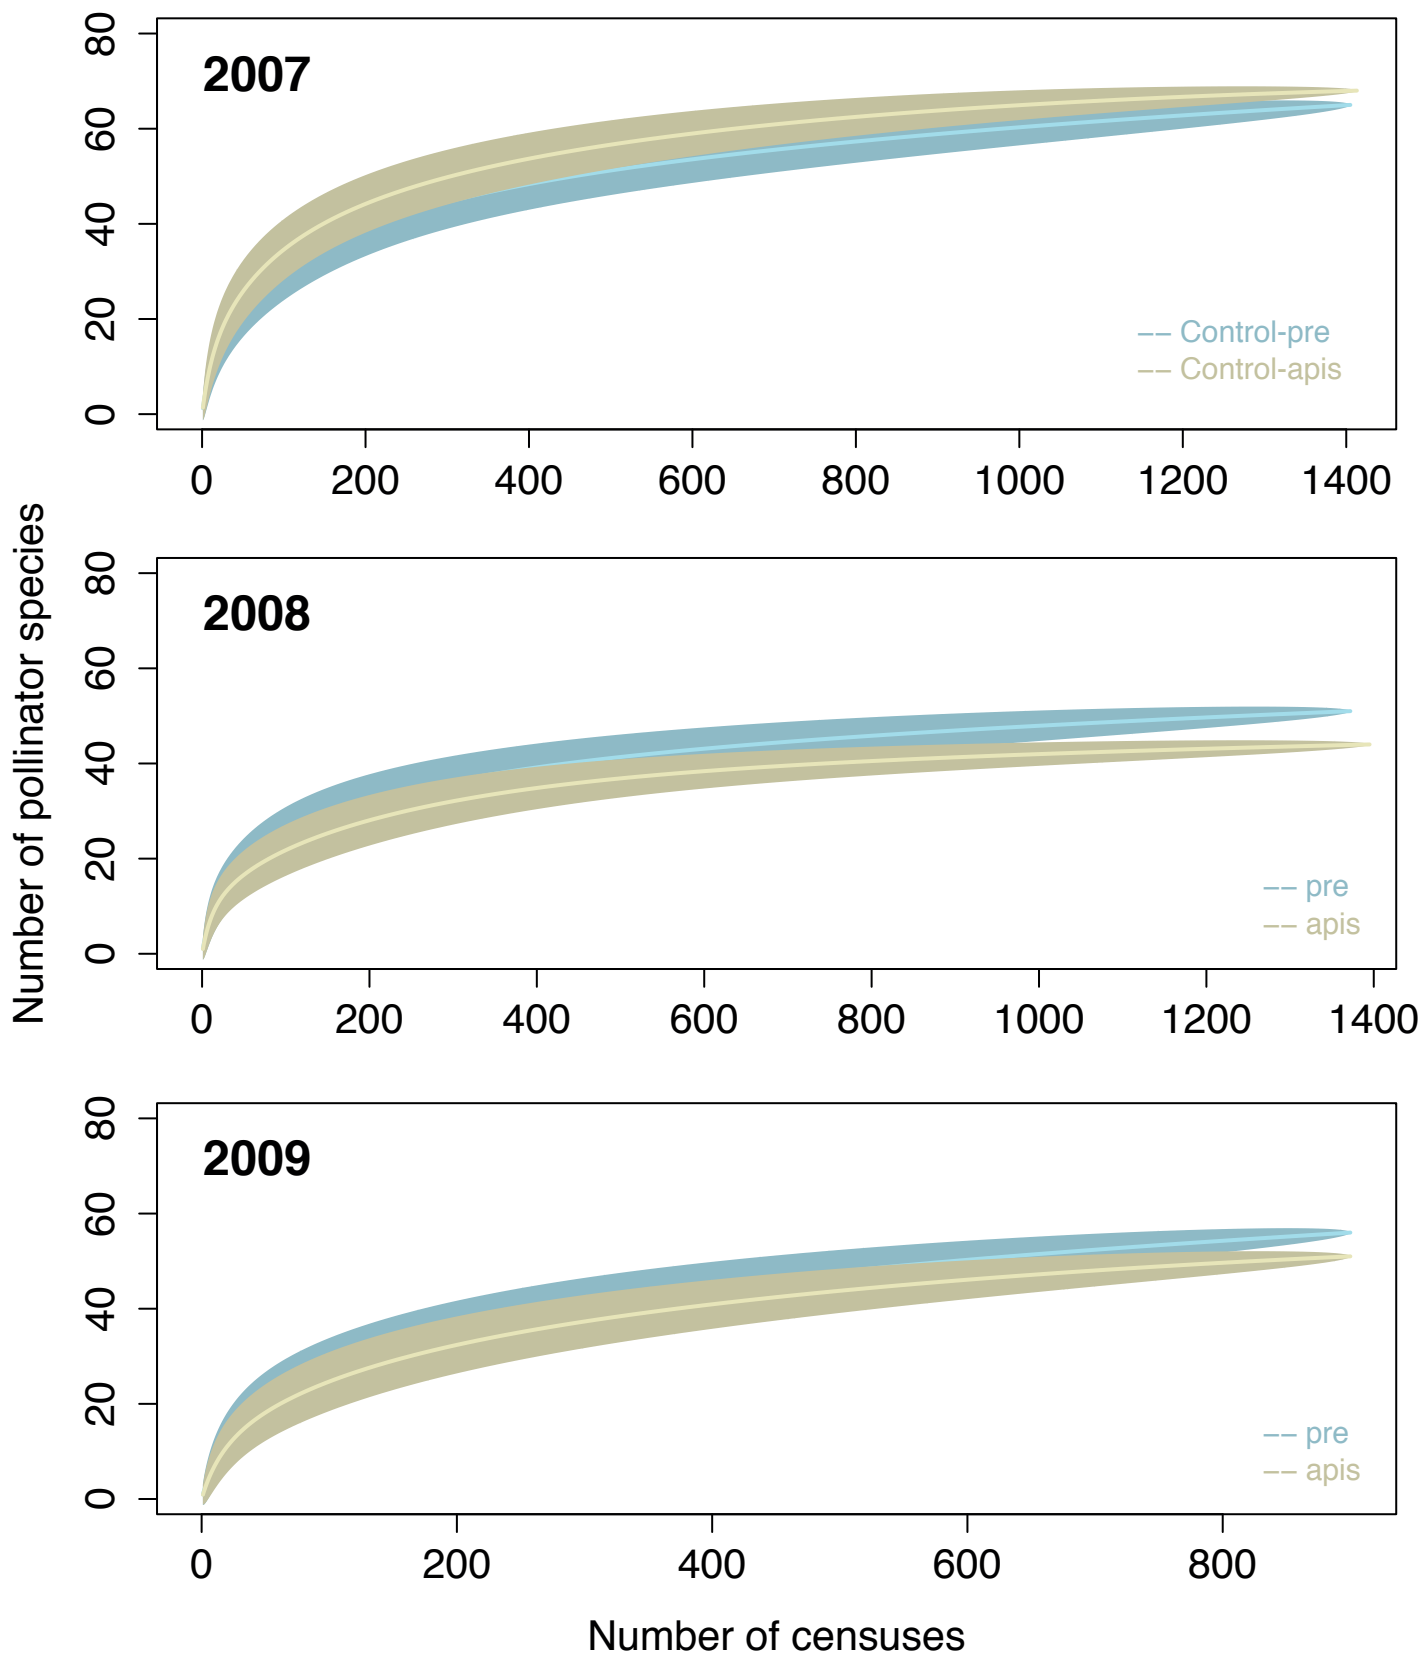

2007

control-pre

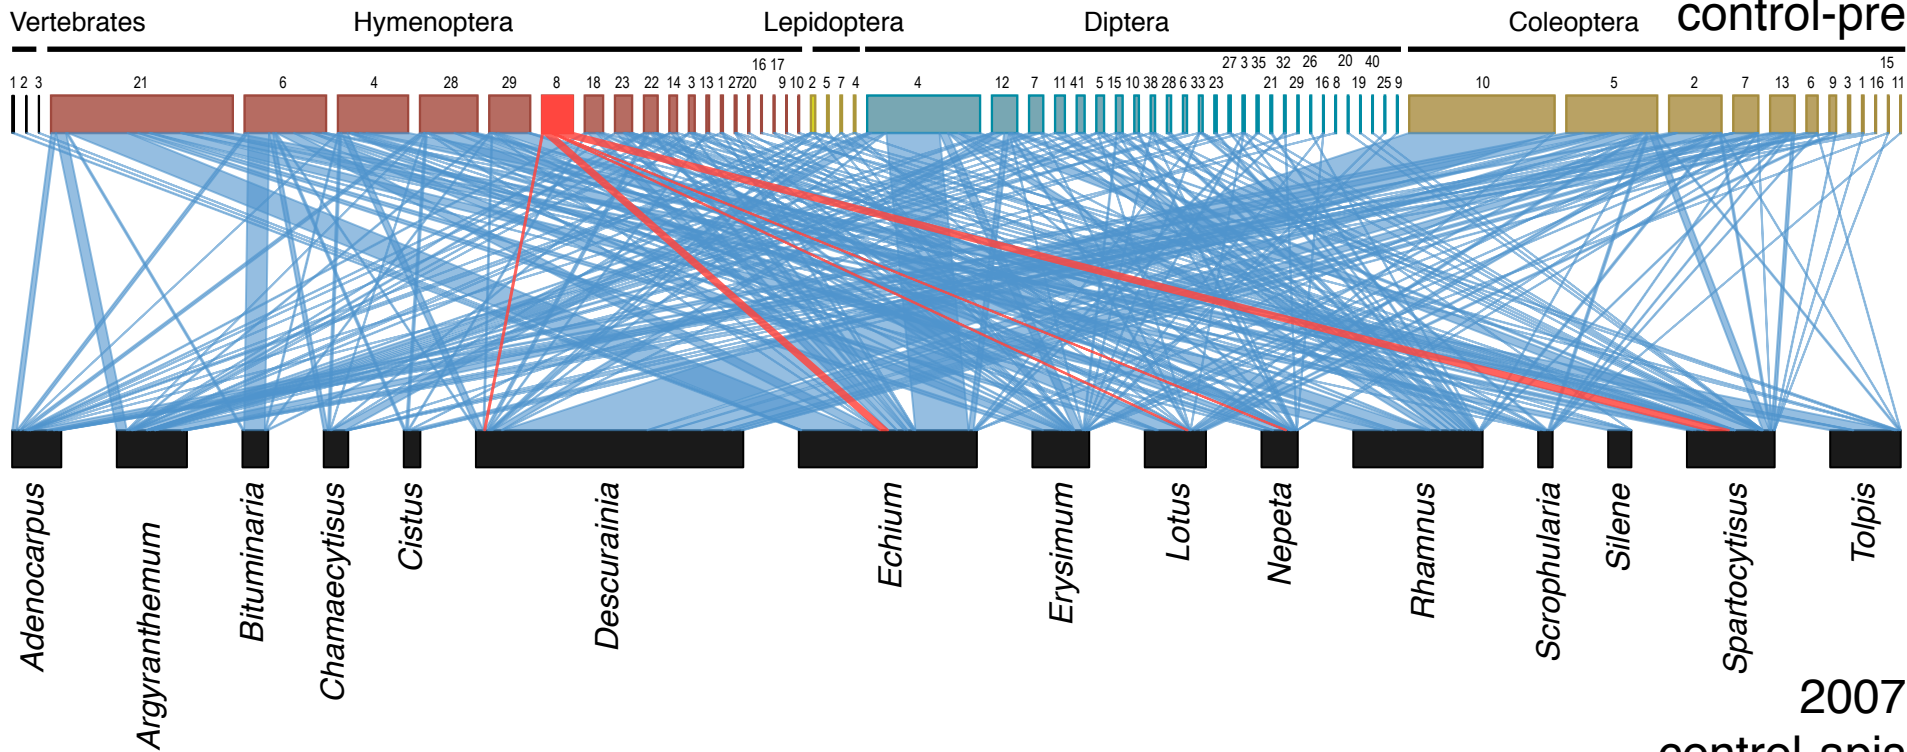

2007

control-apis

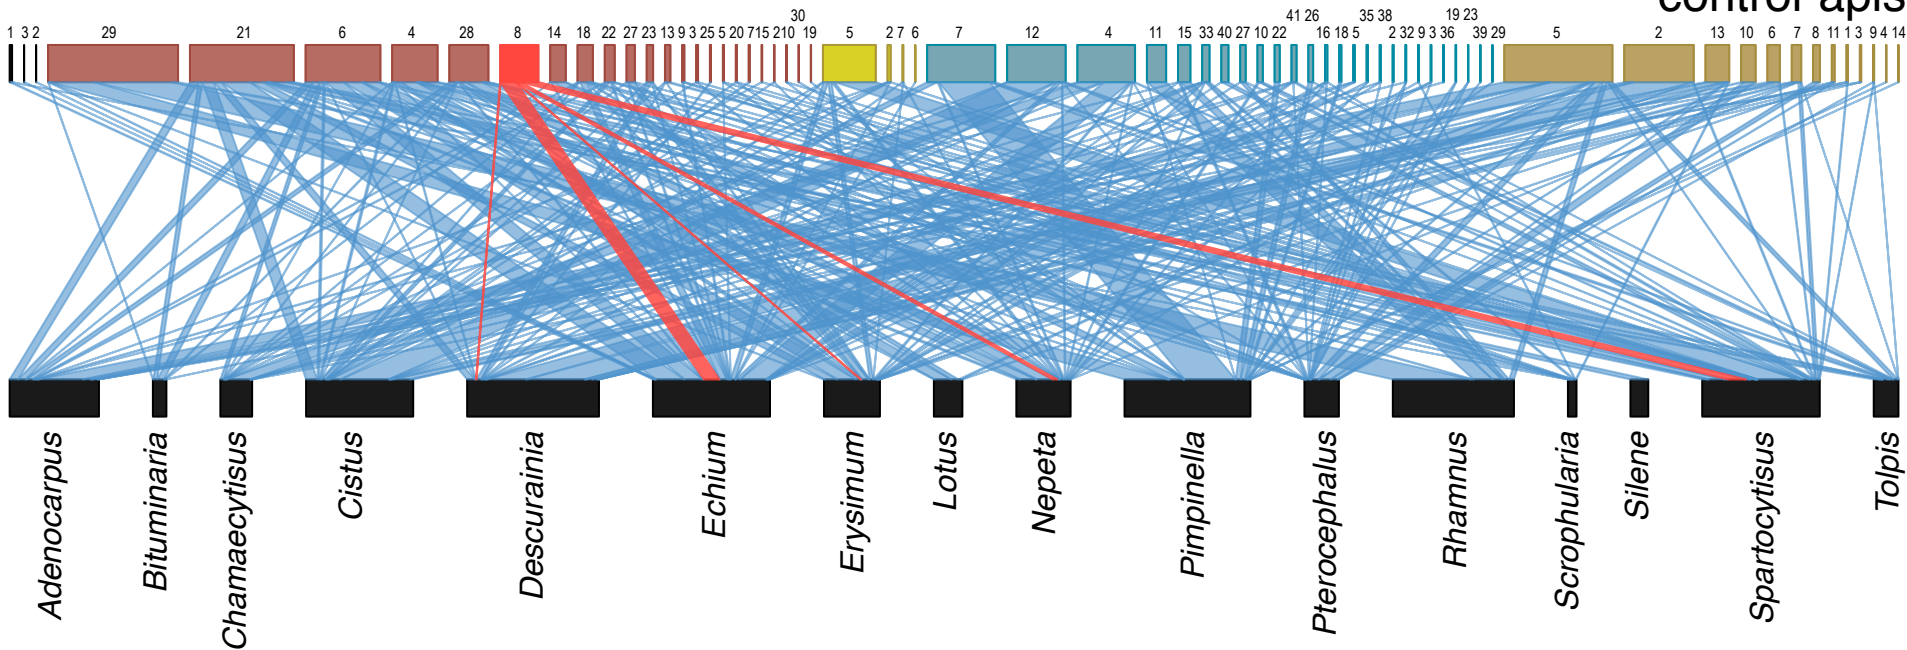

2008

pre

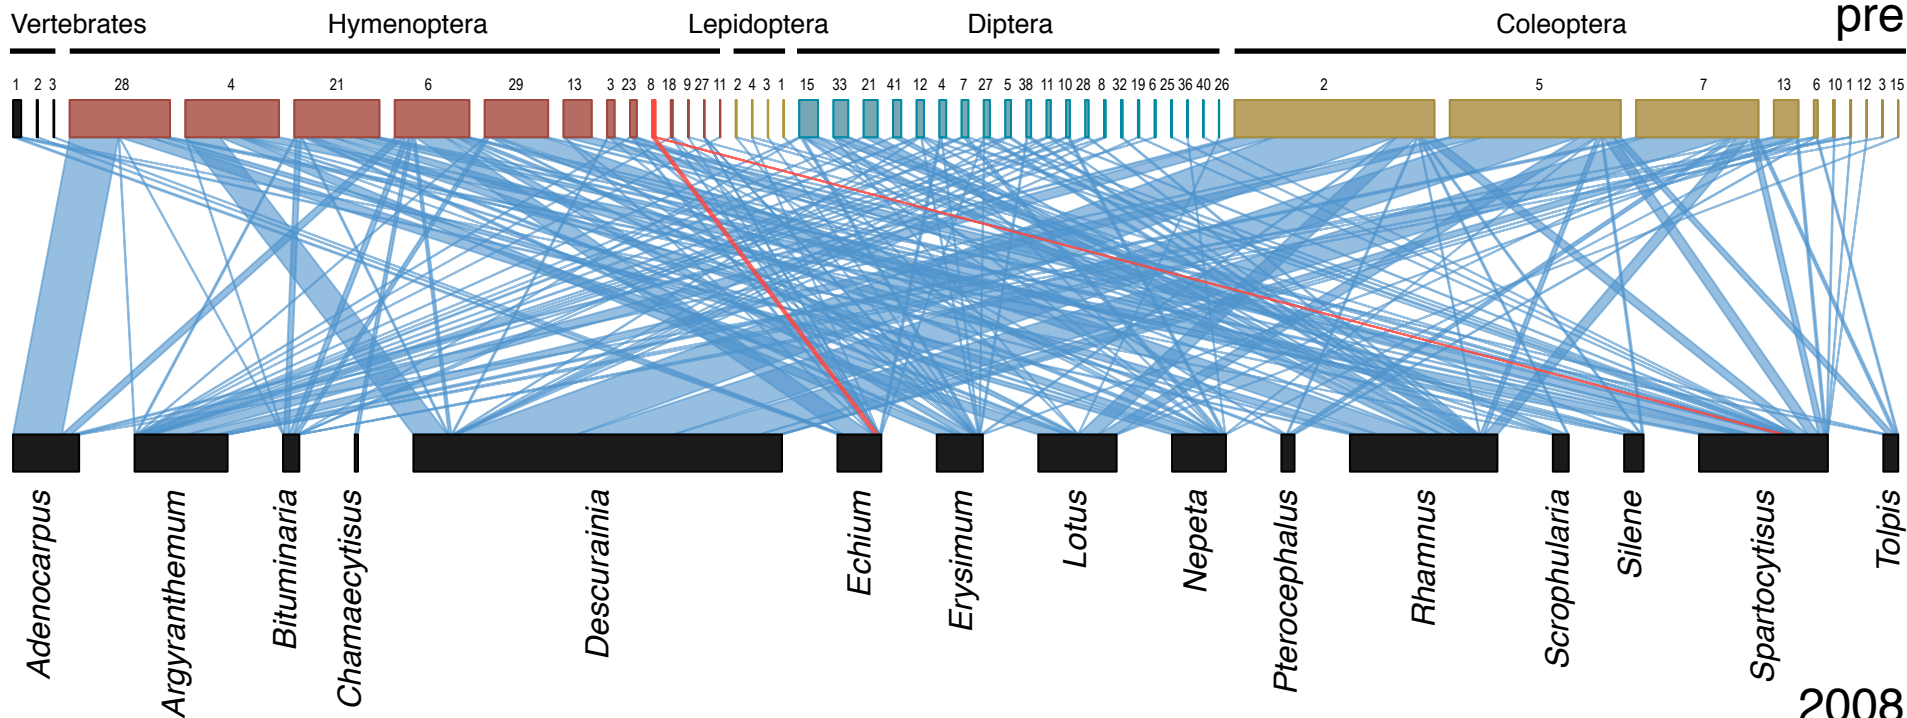

2008

apis

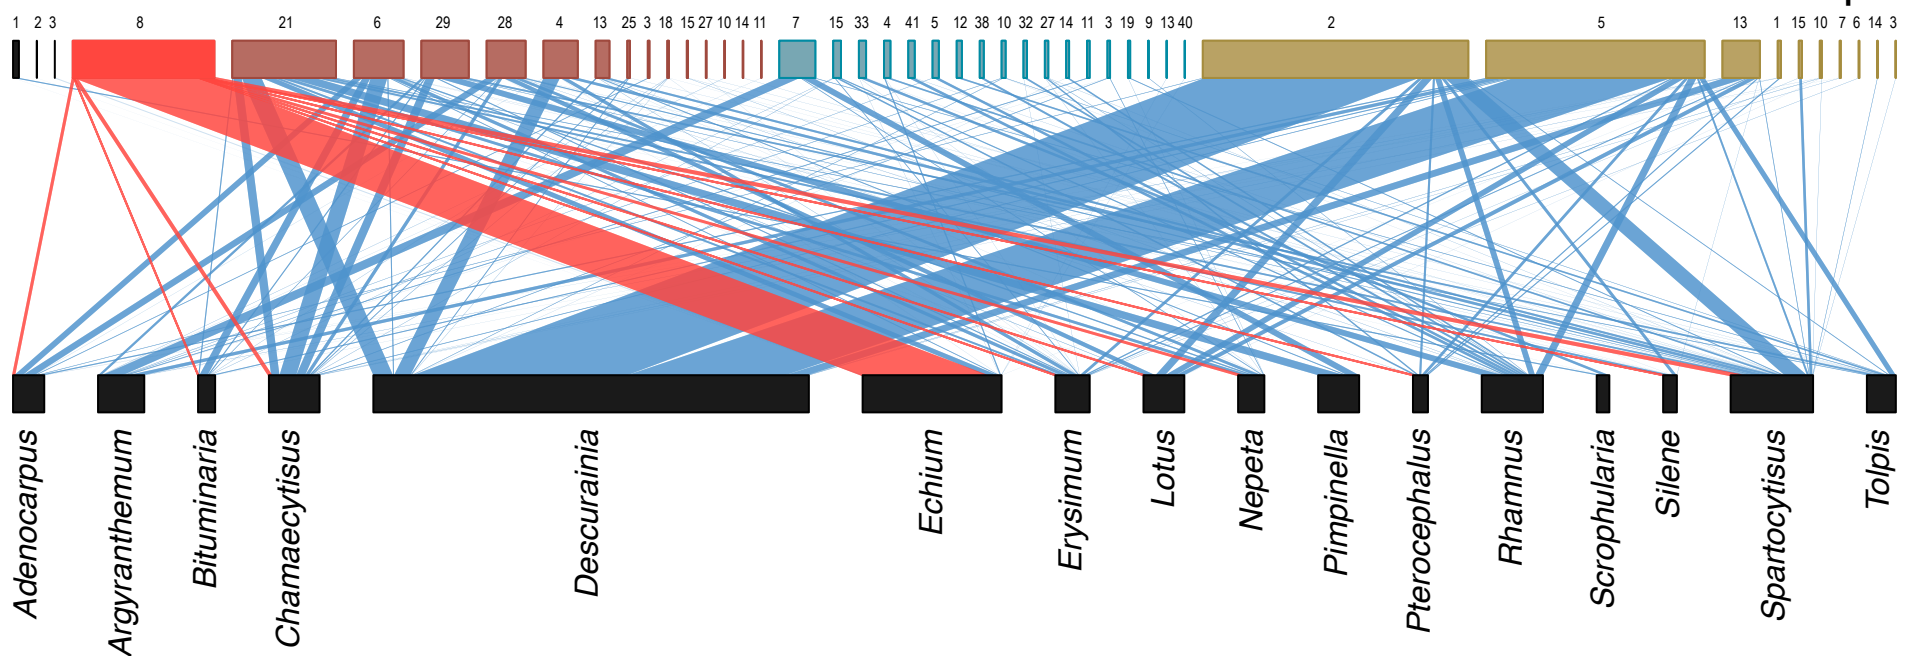



2009

pre

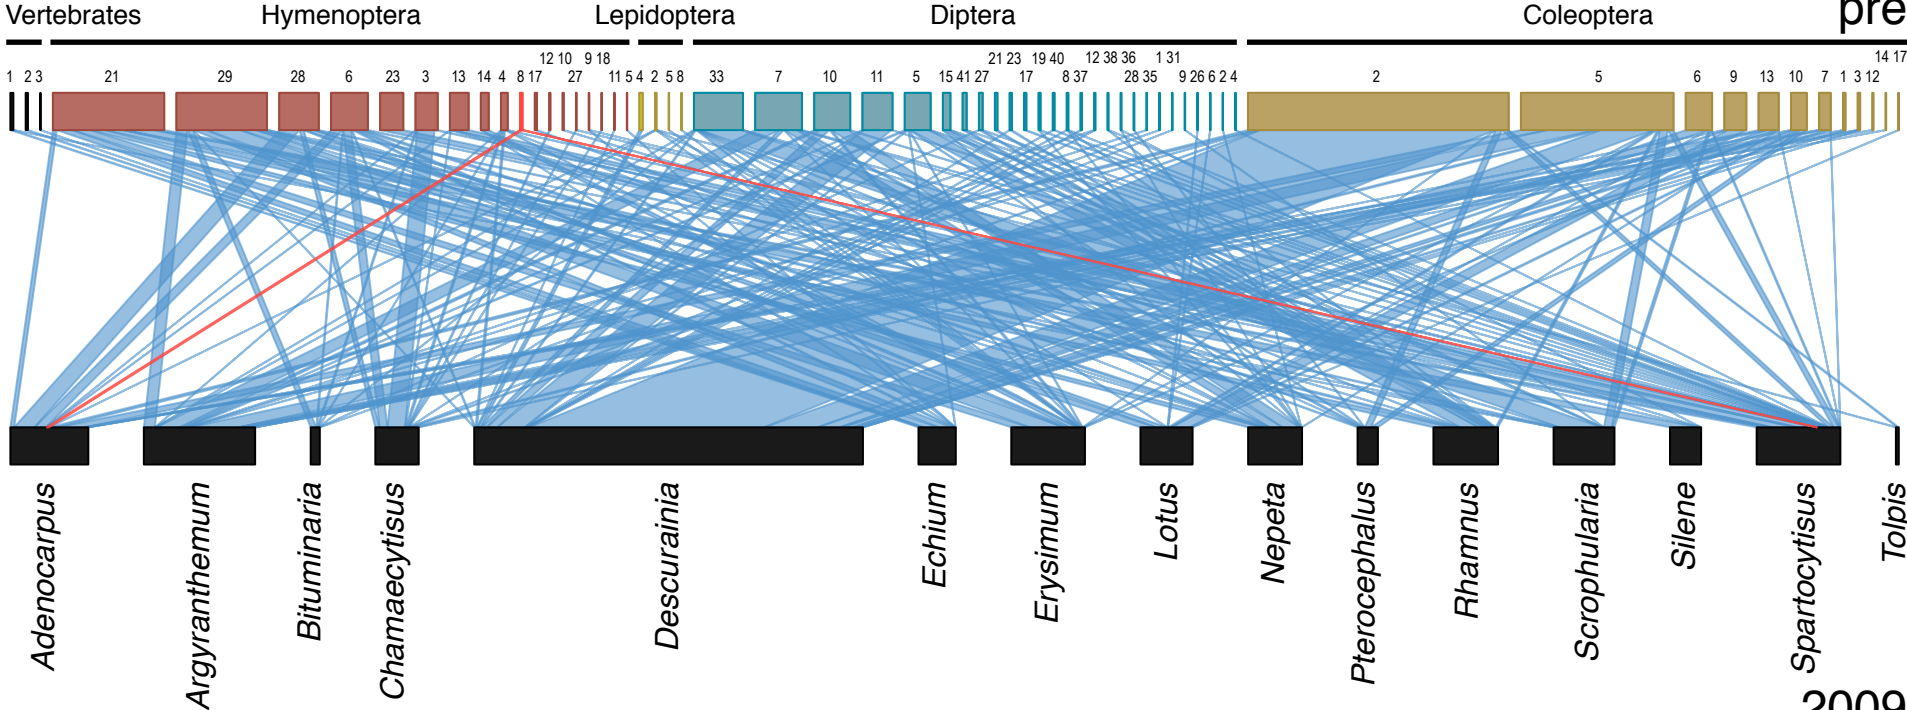

2009

apis

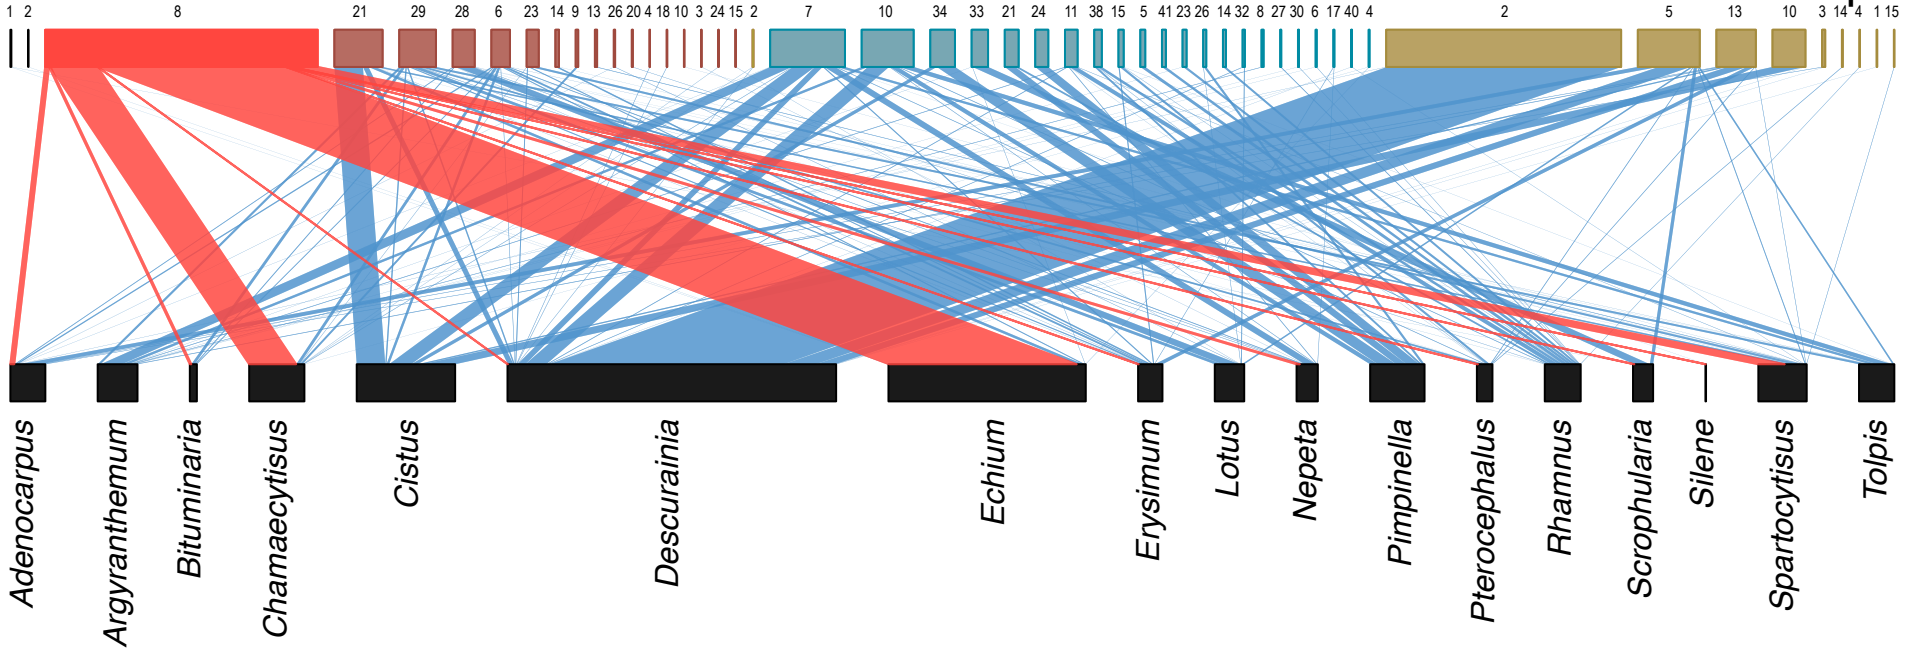

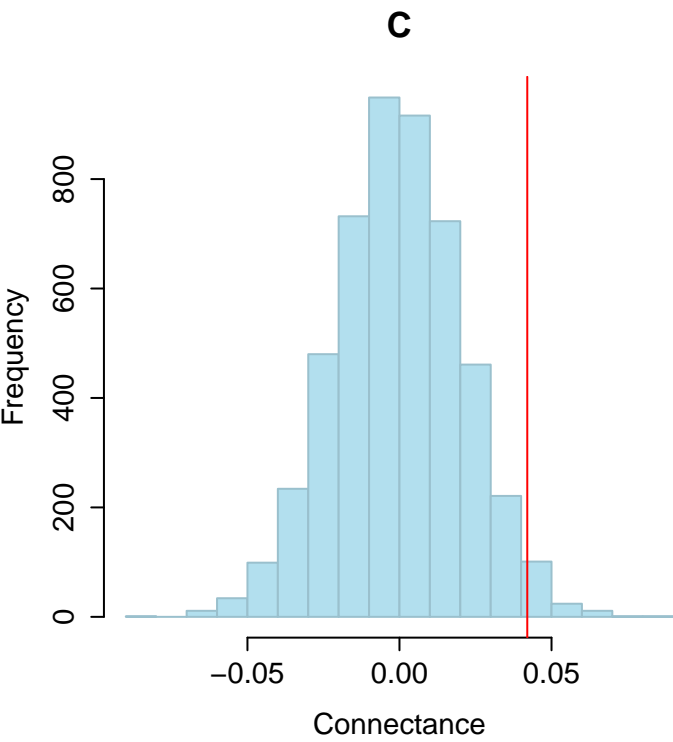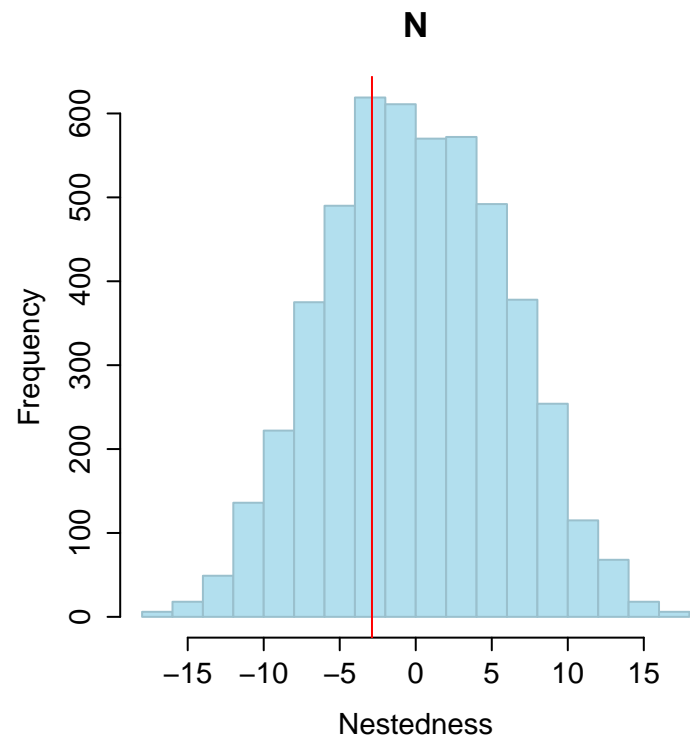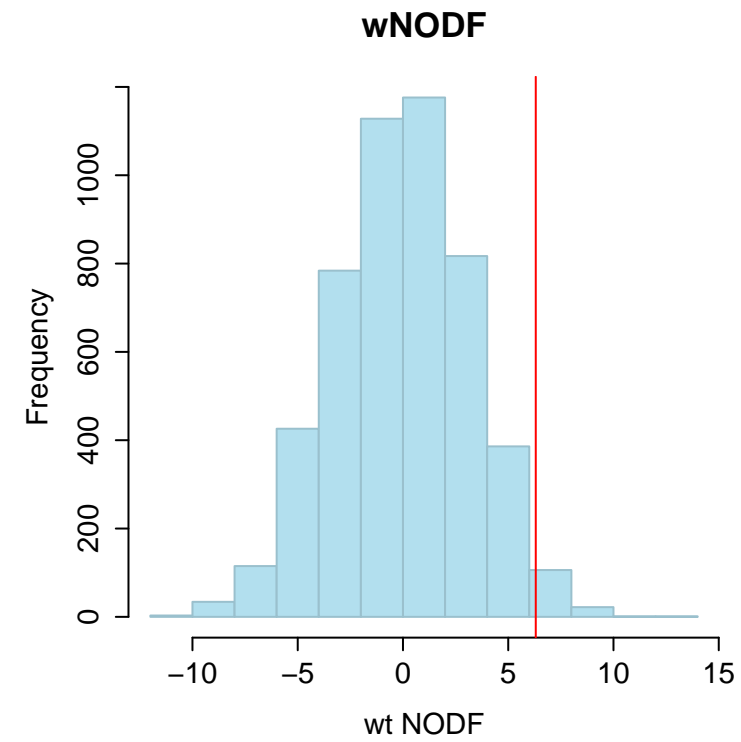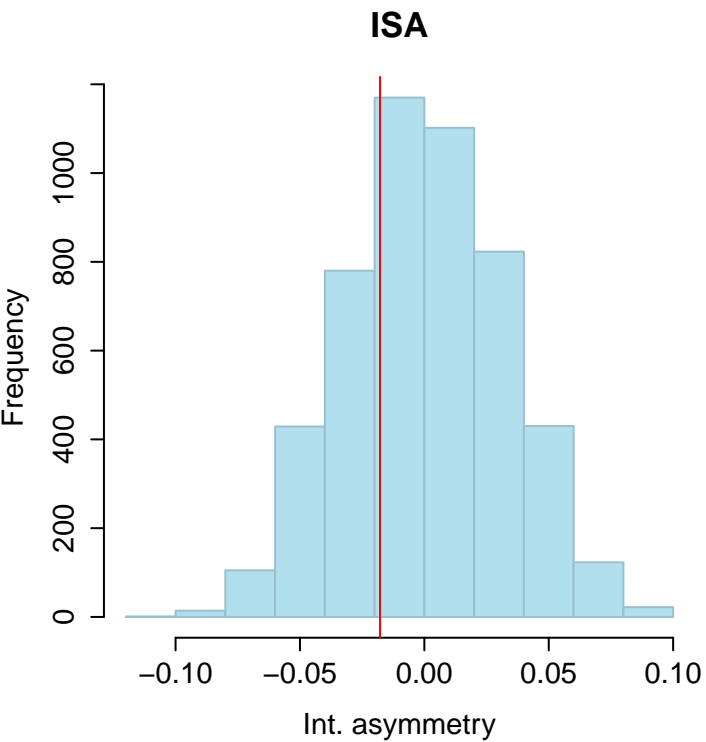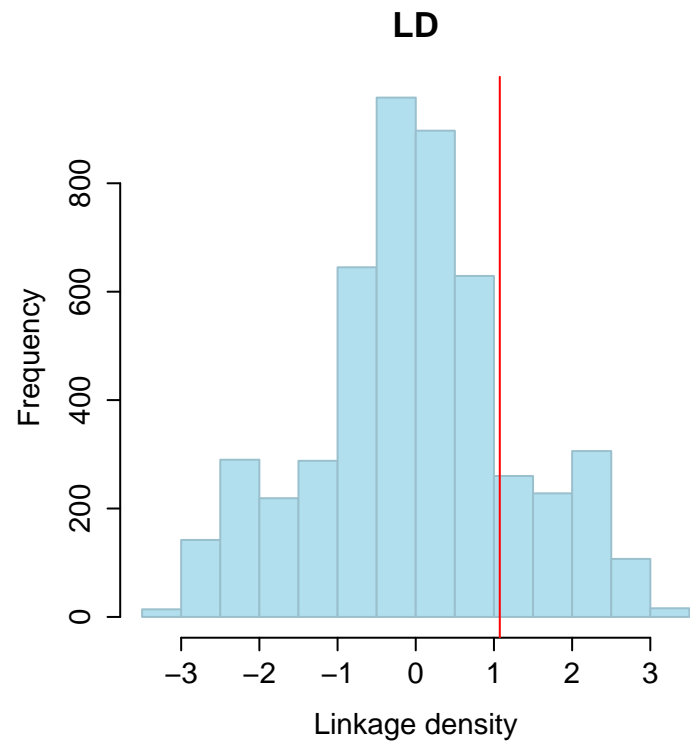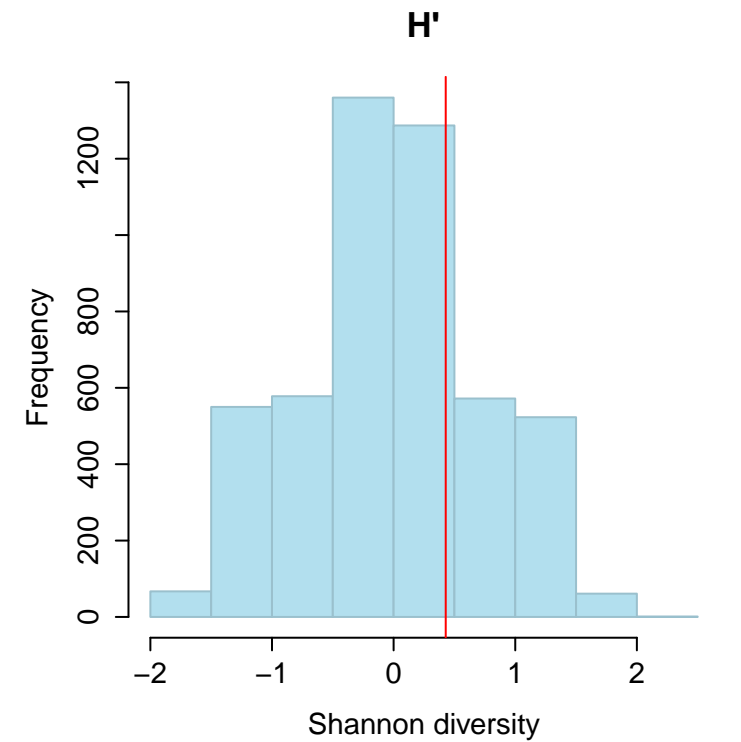



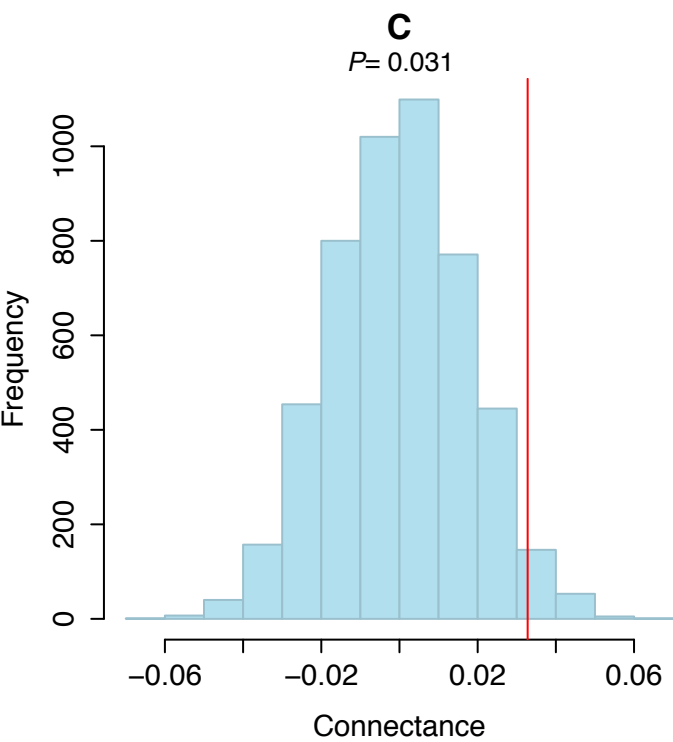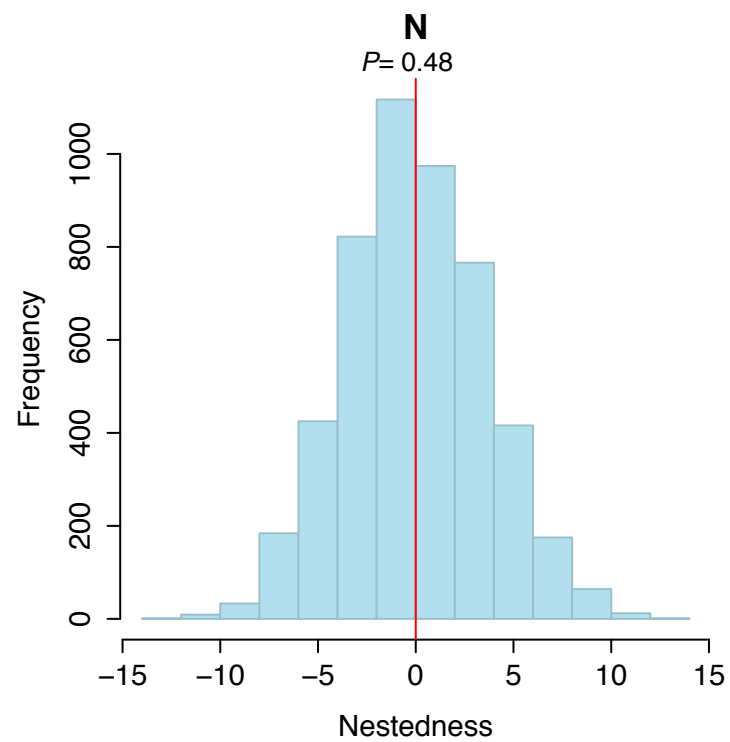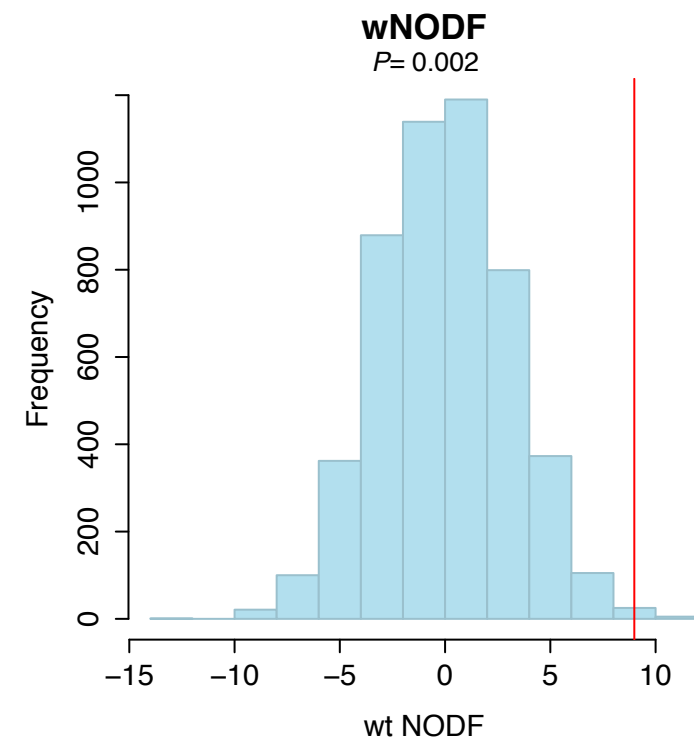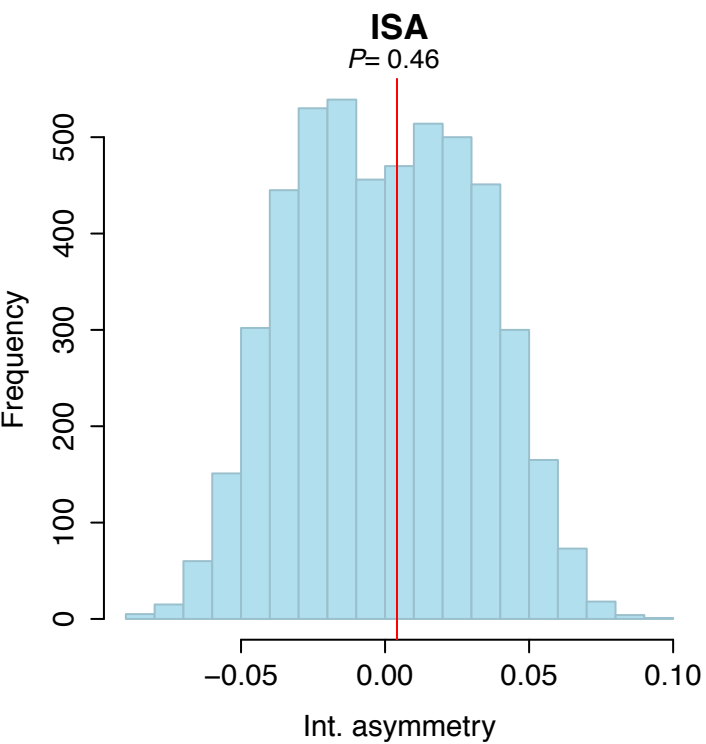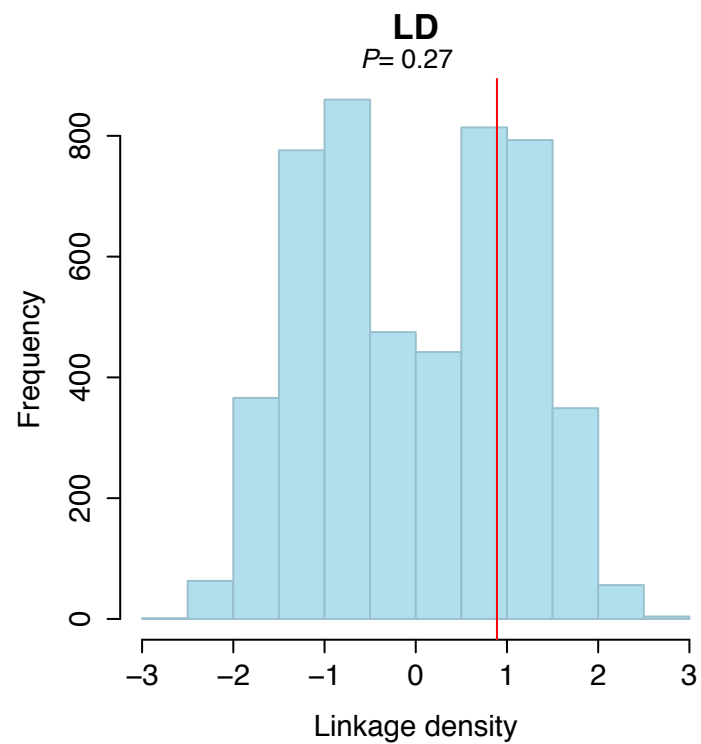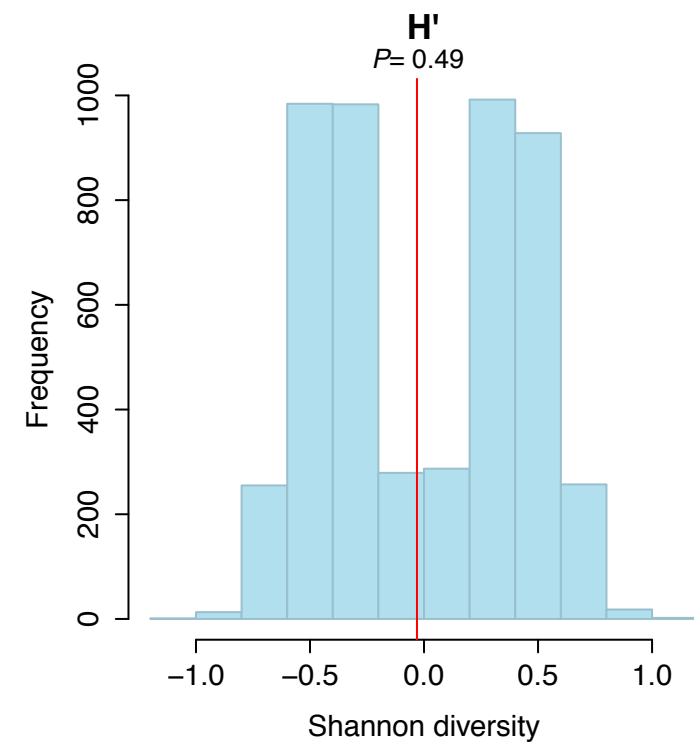

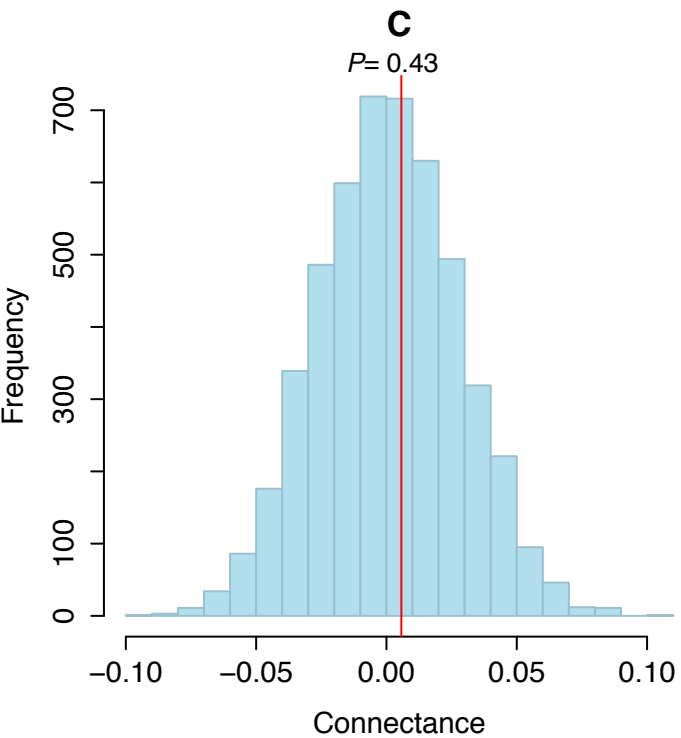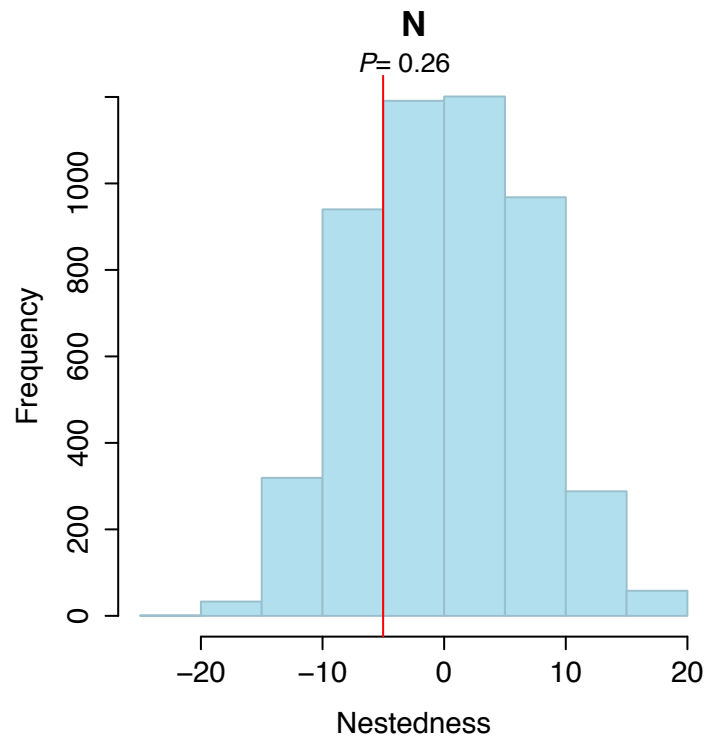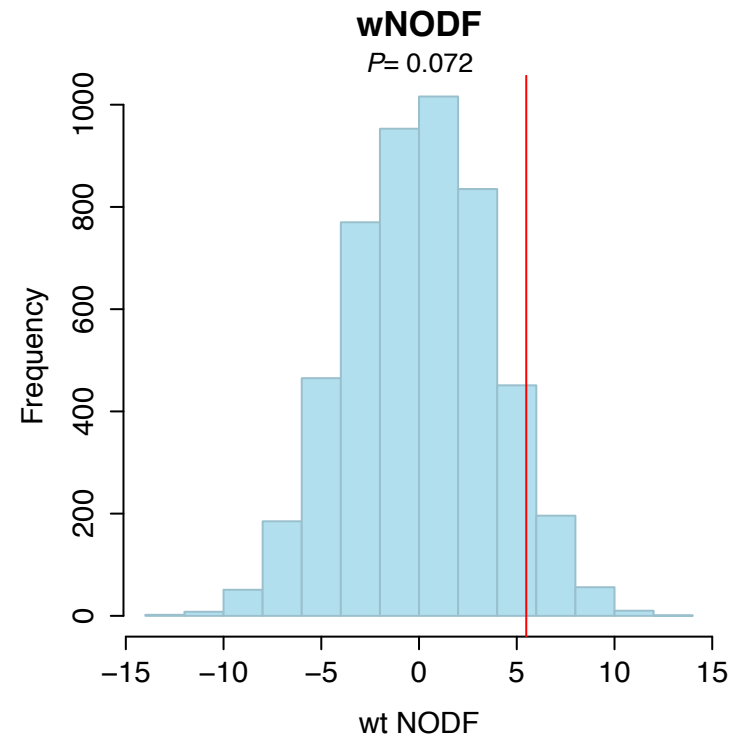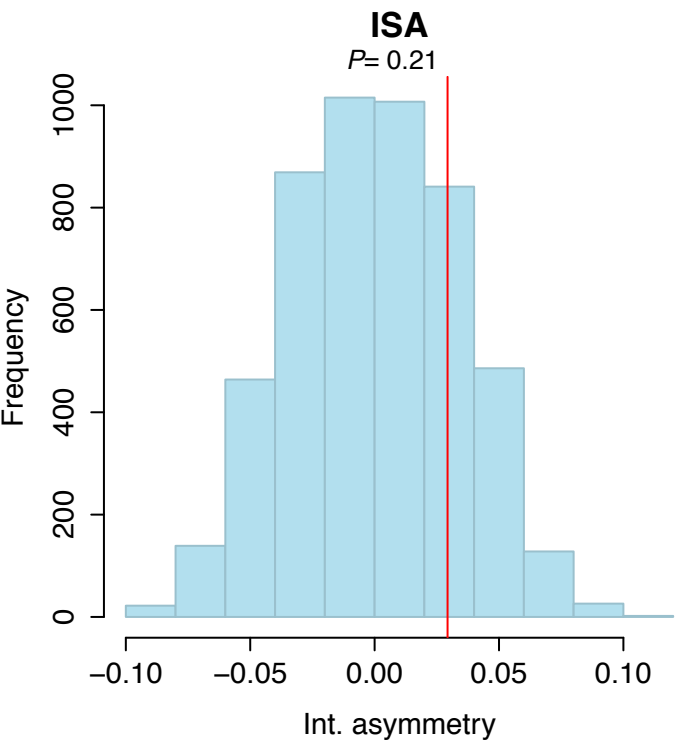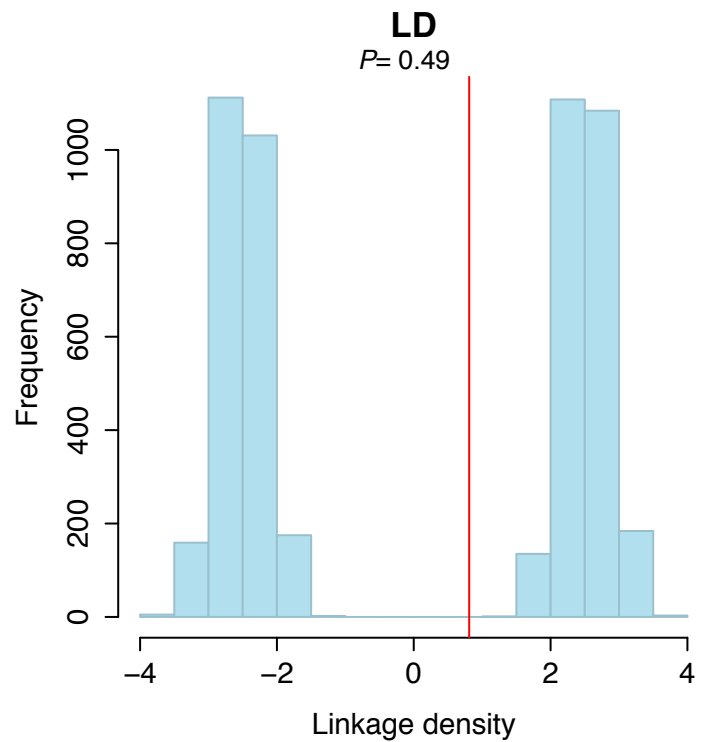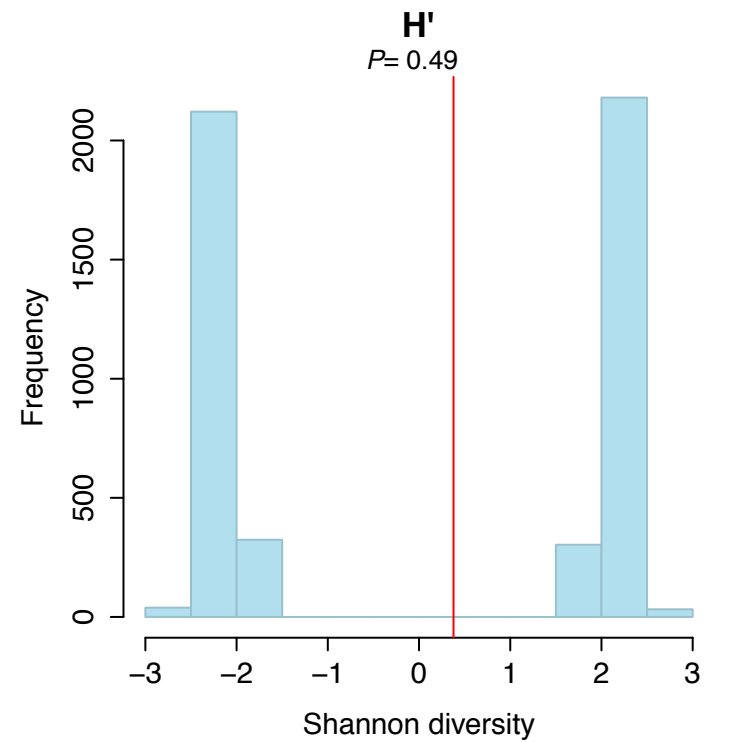

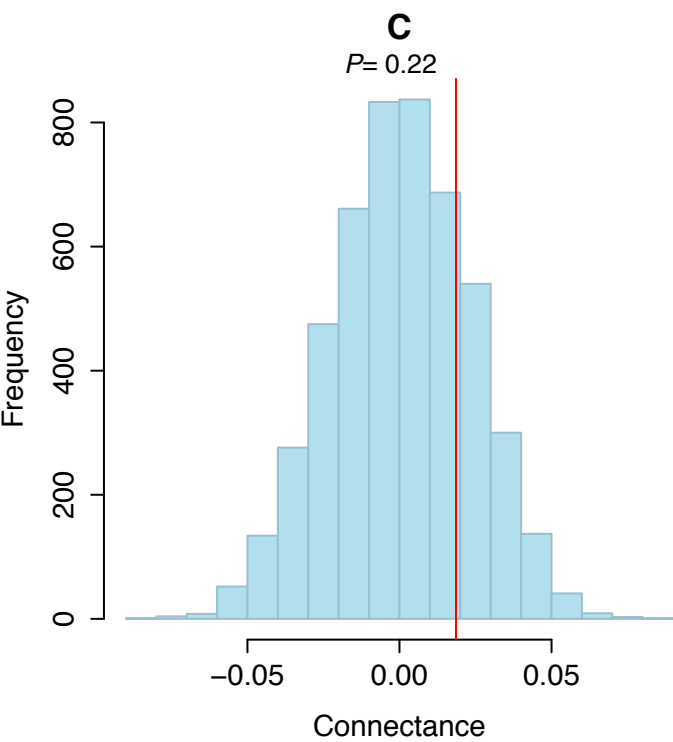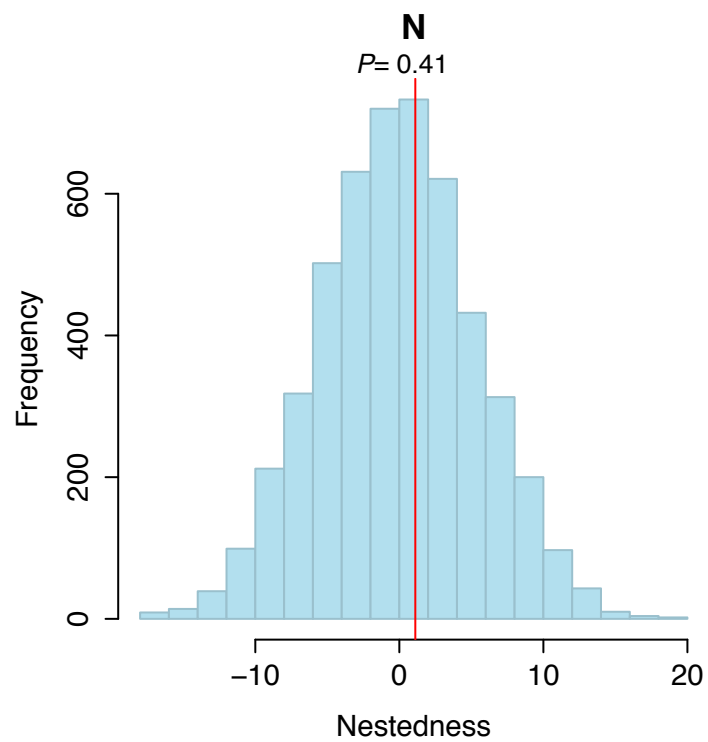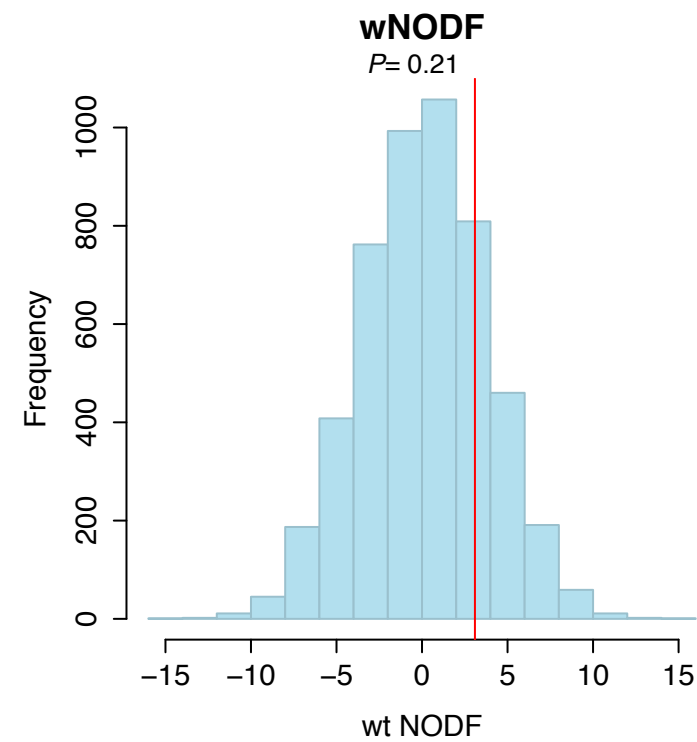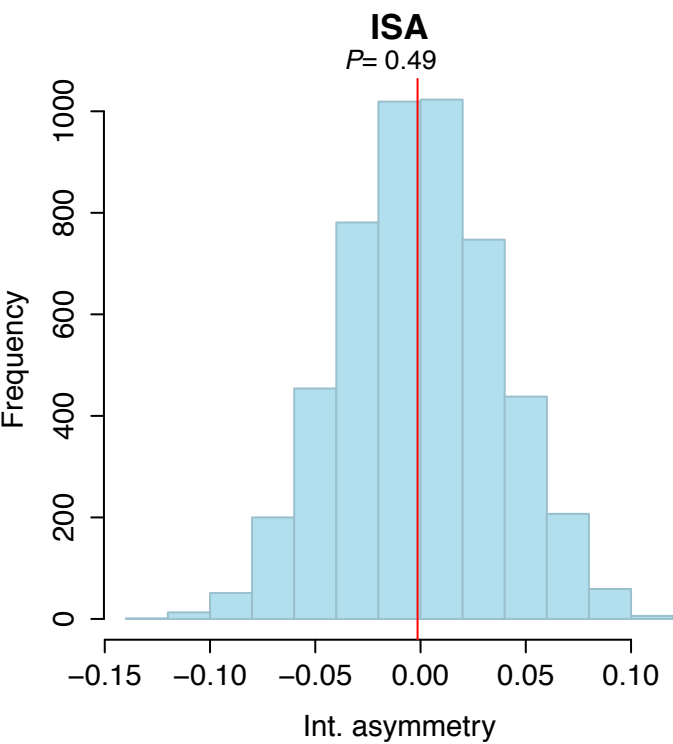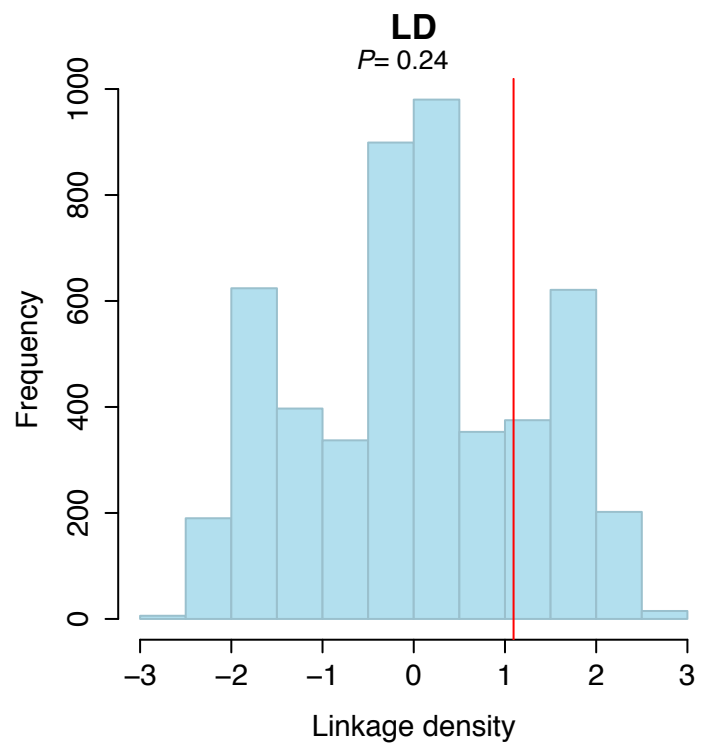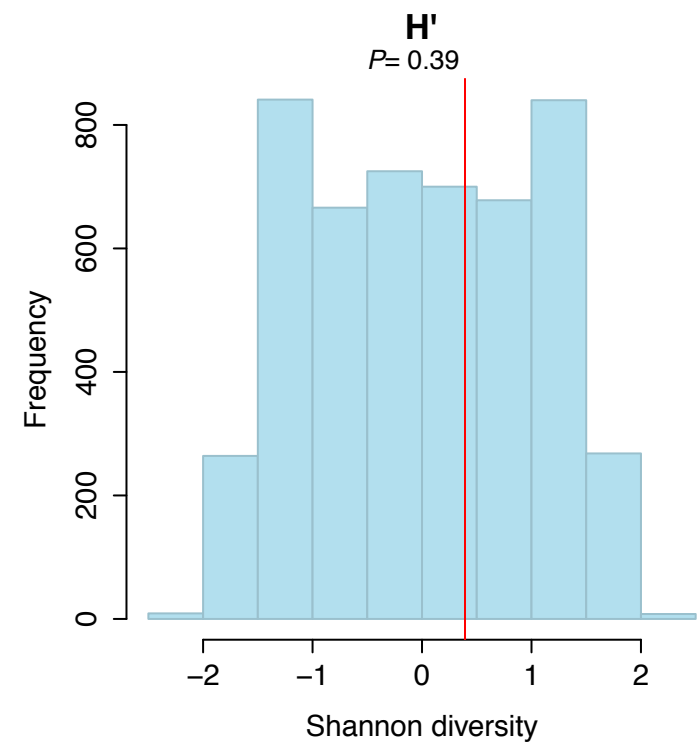



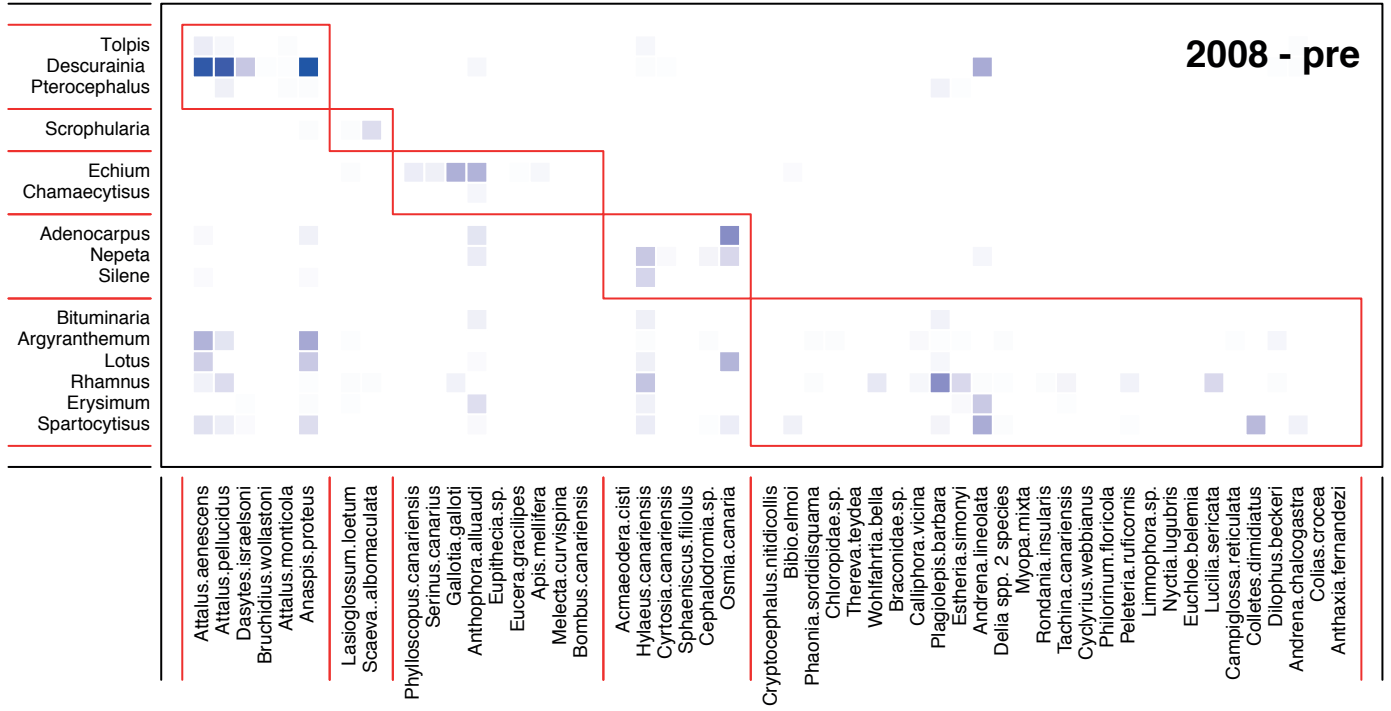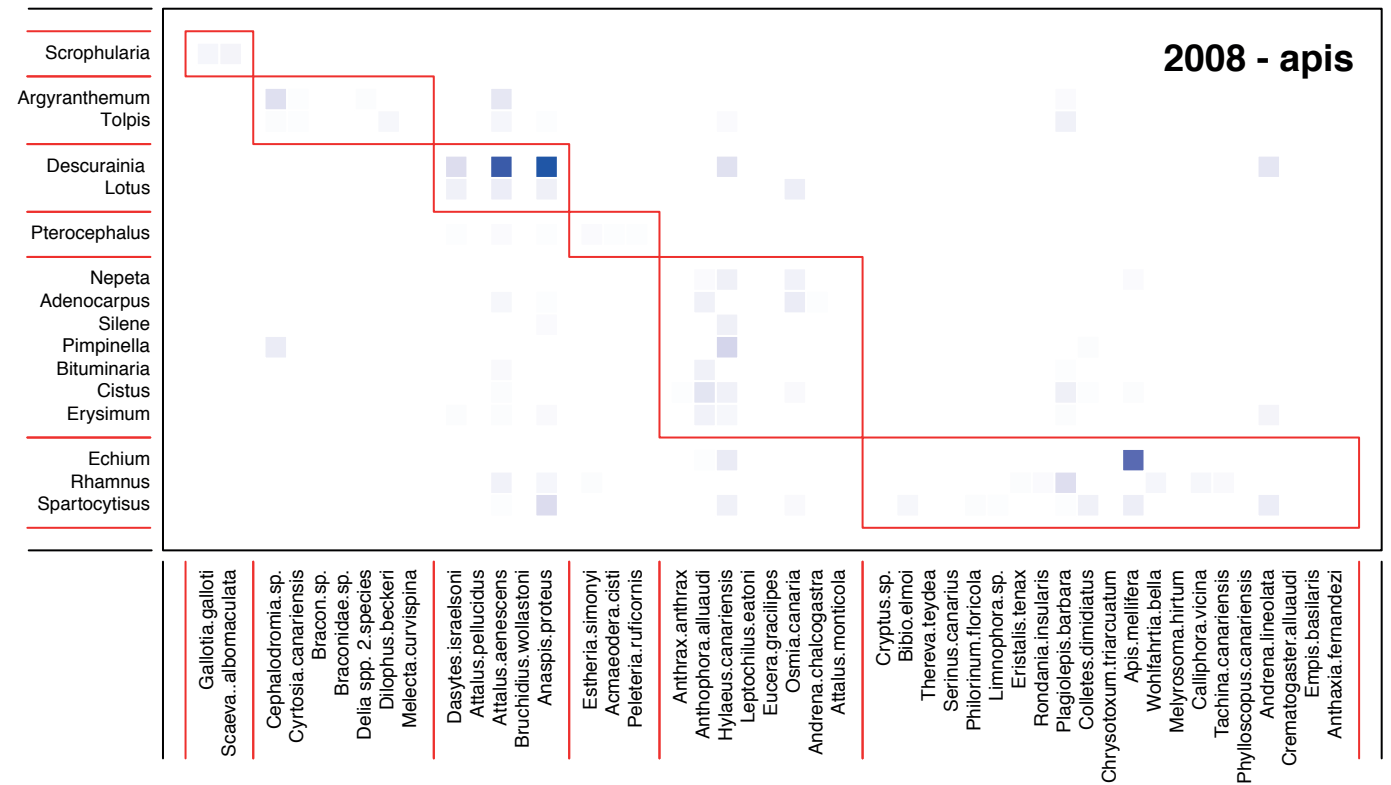



## 2008-2009 - pre

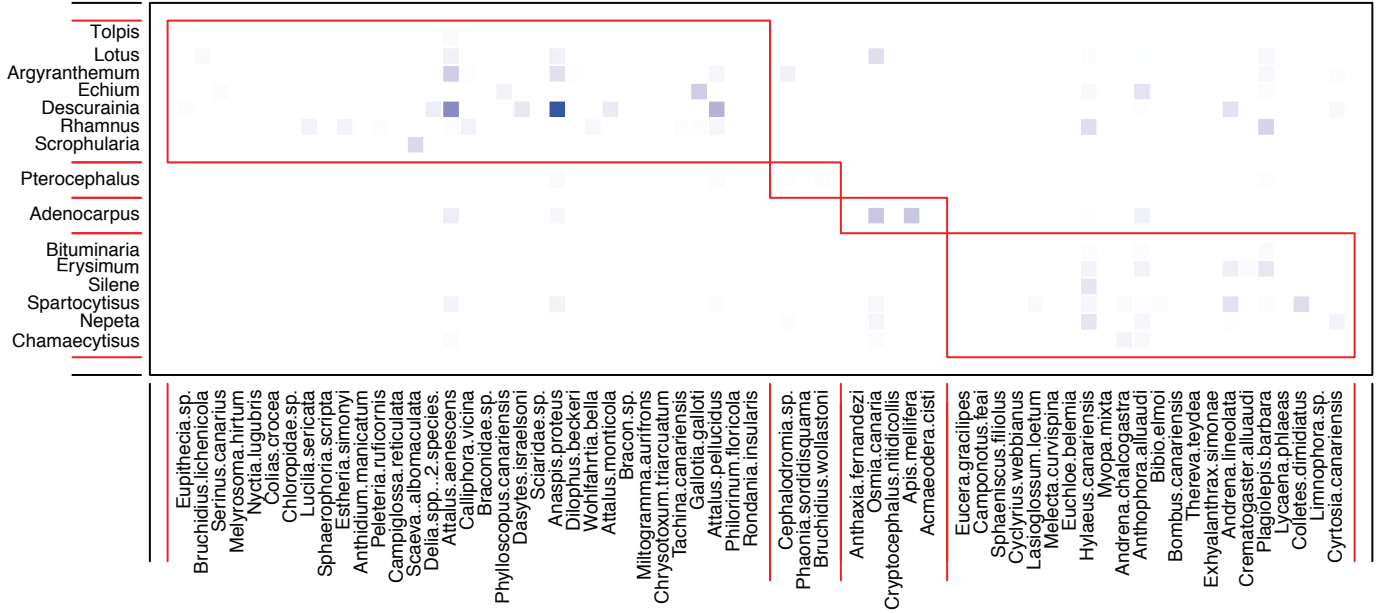

## 2008-2009 - apis

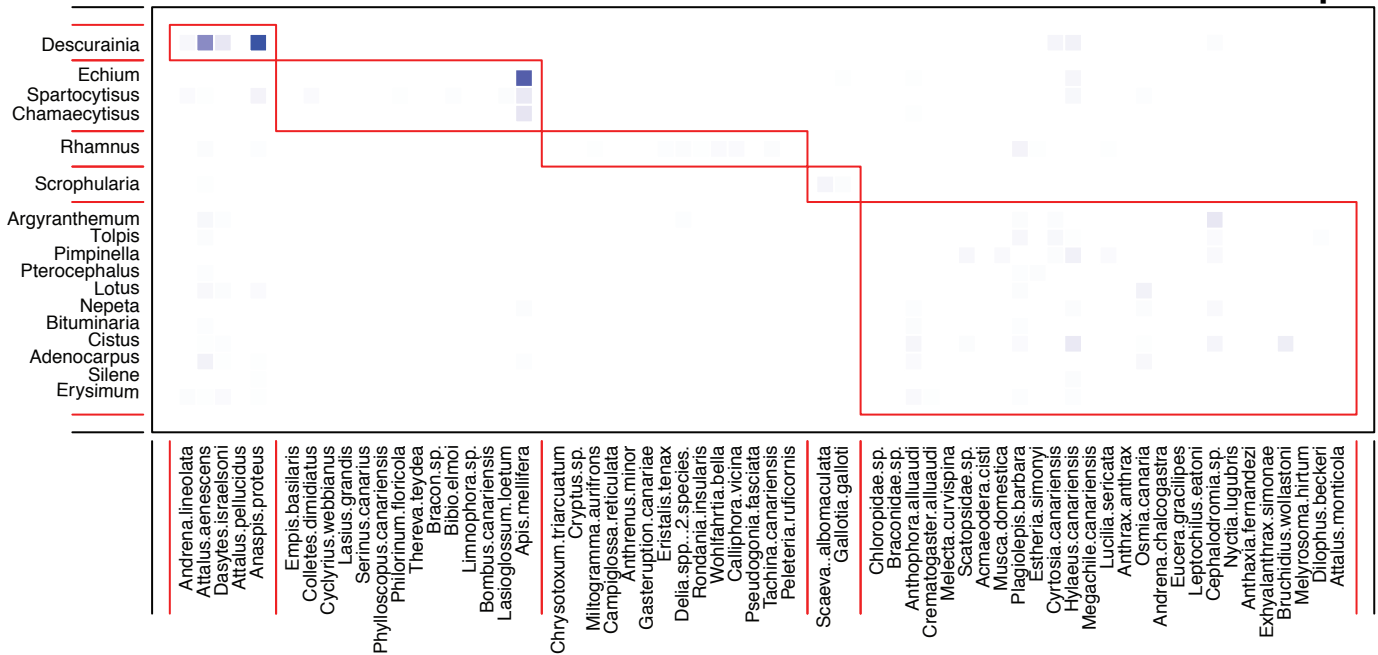

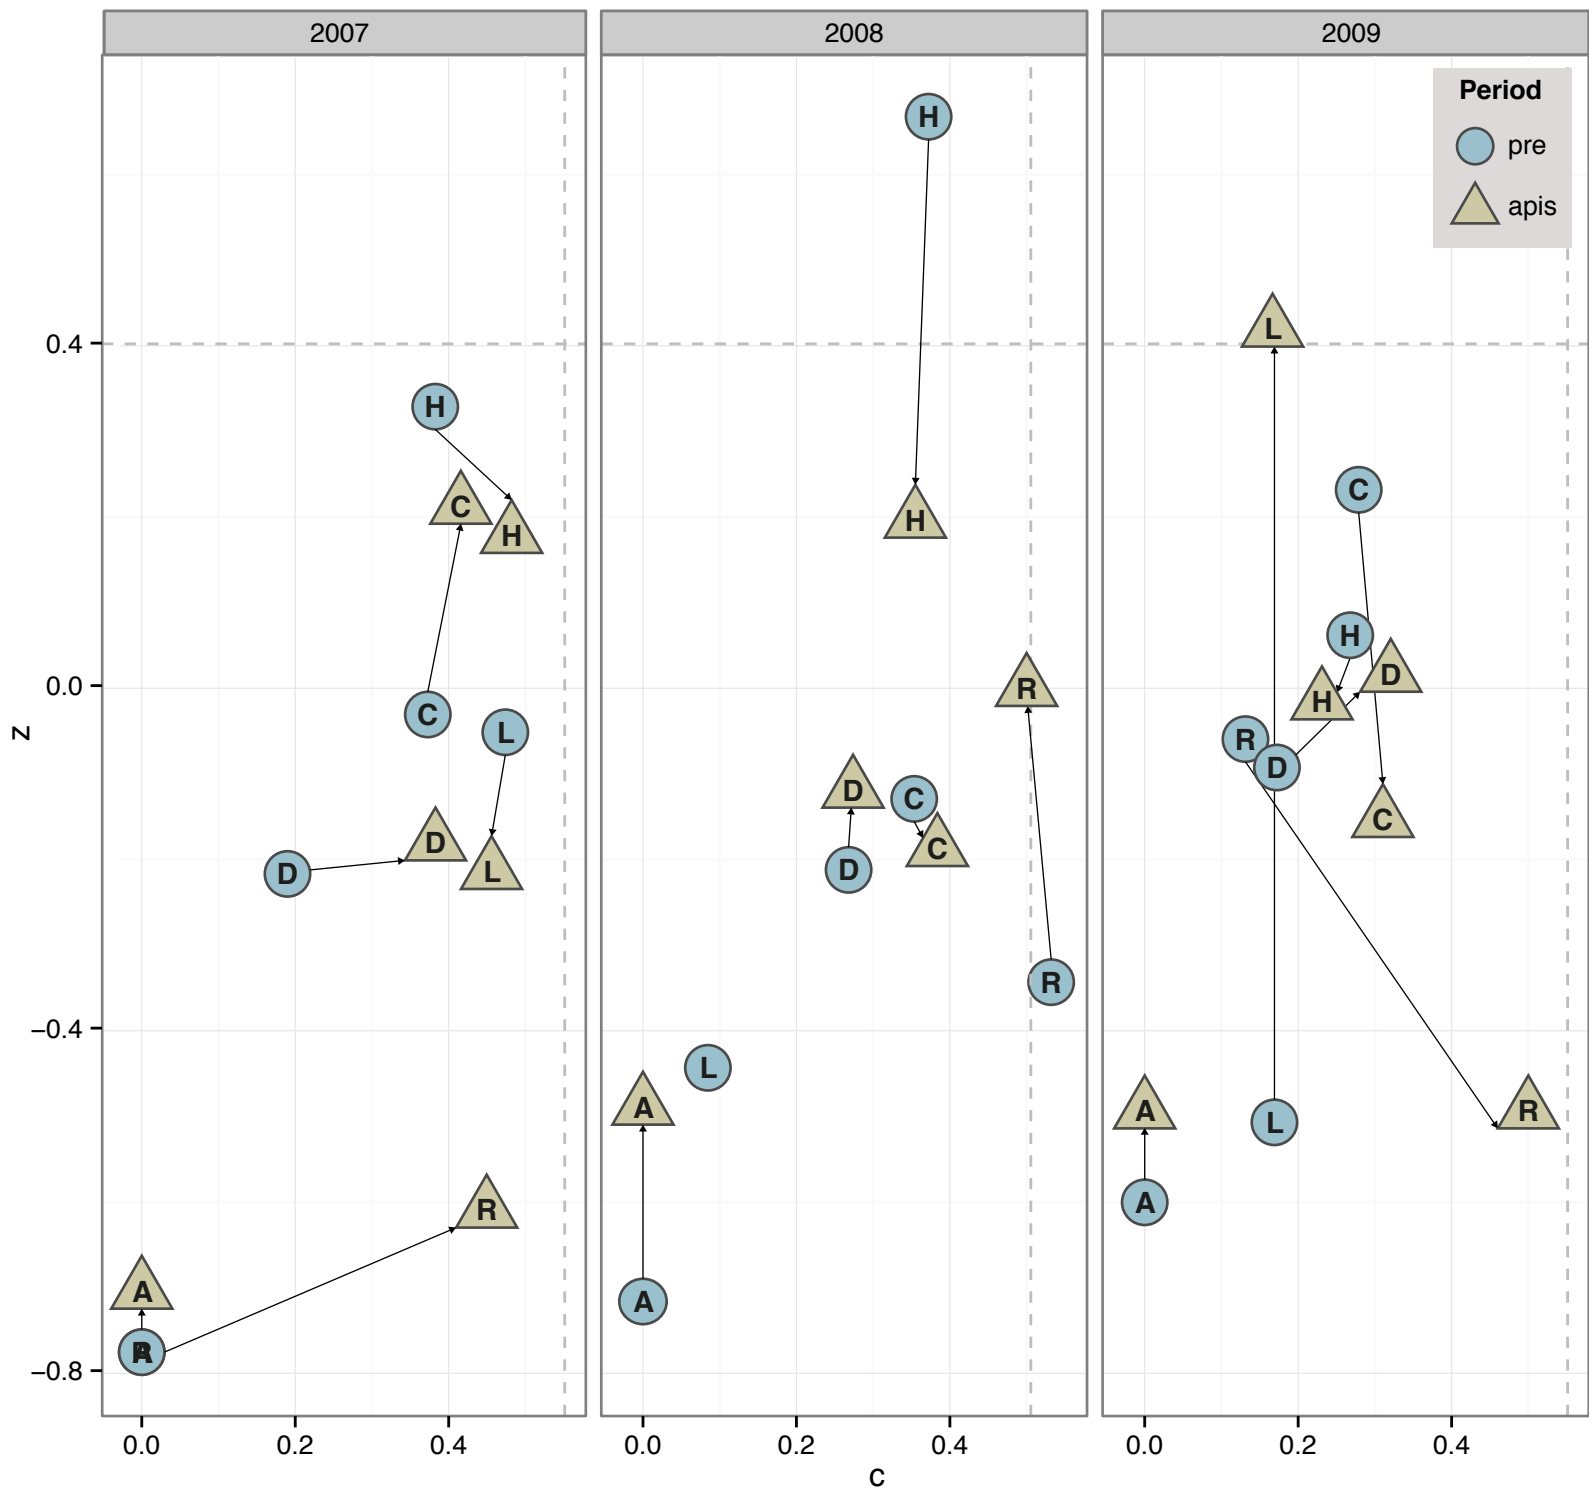



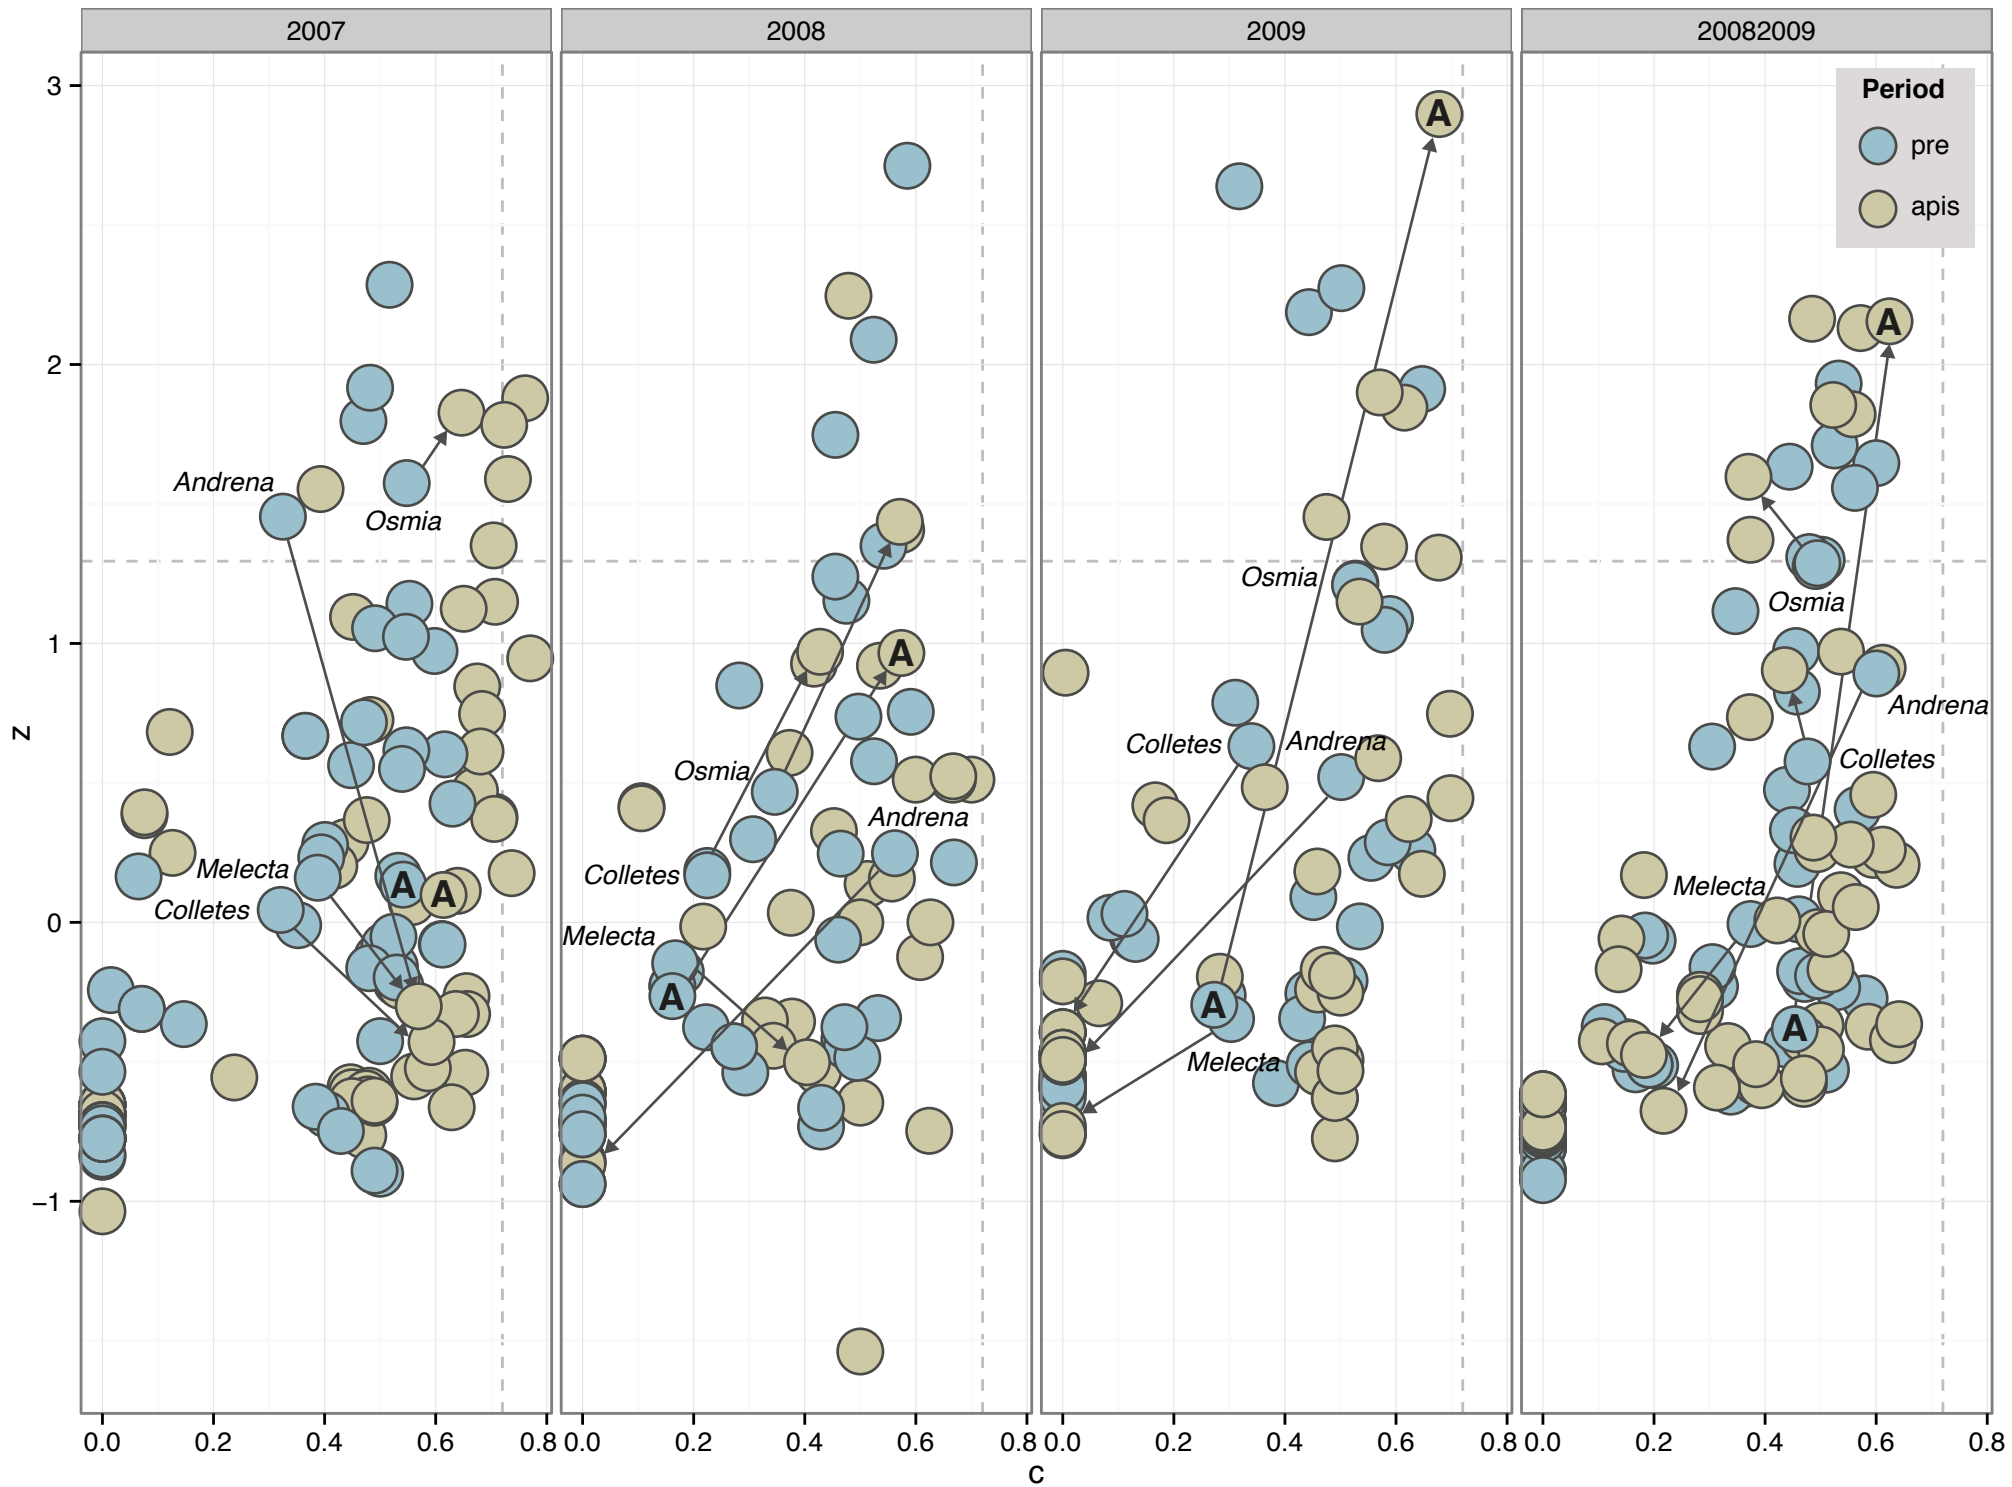

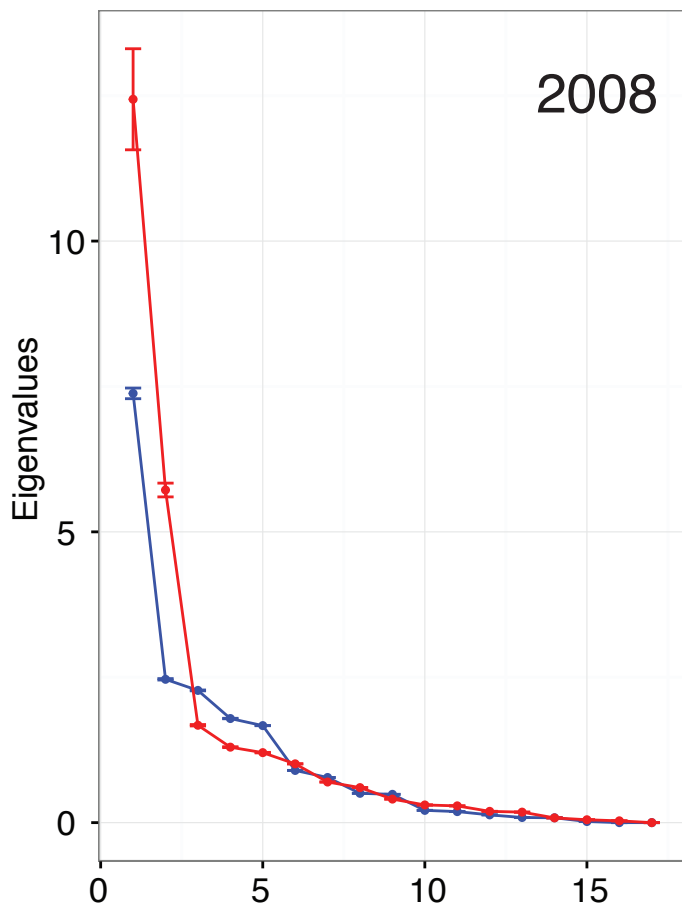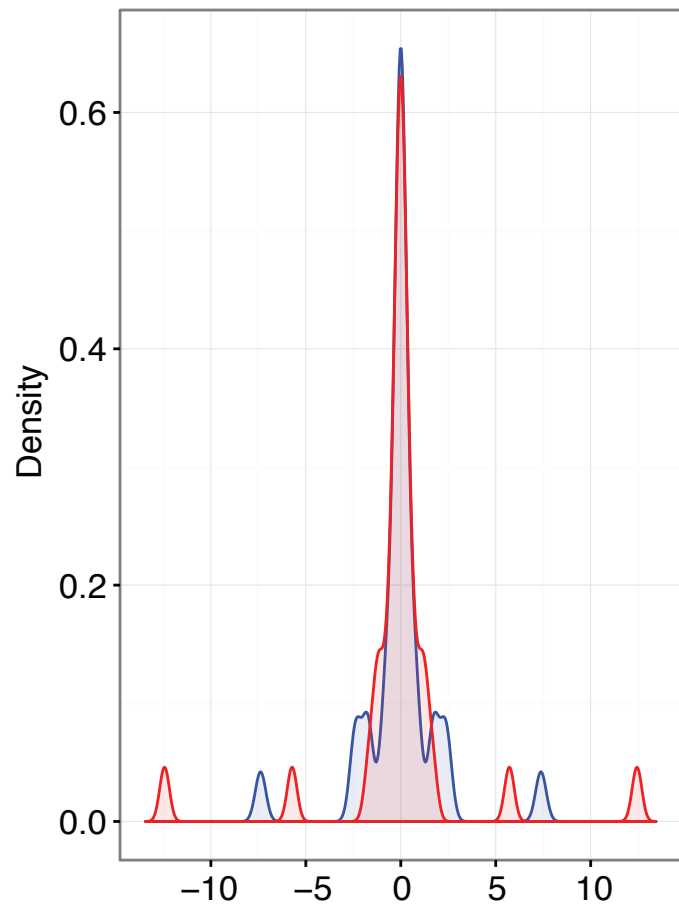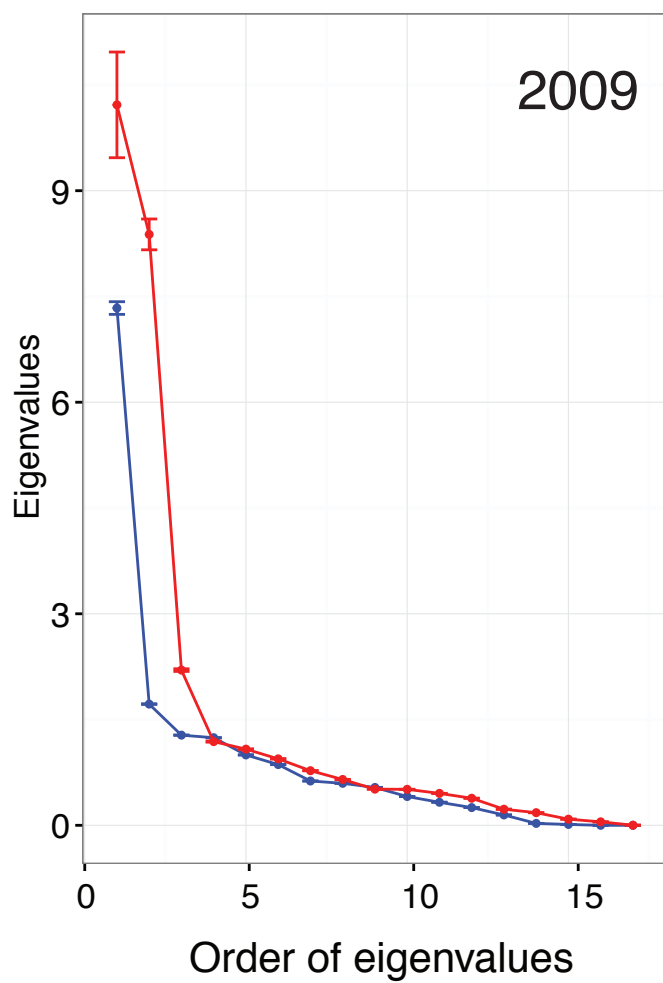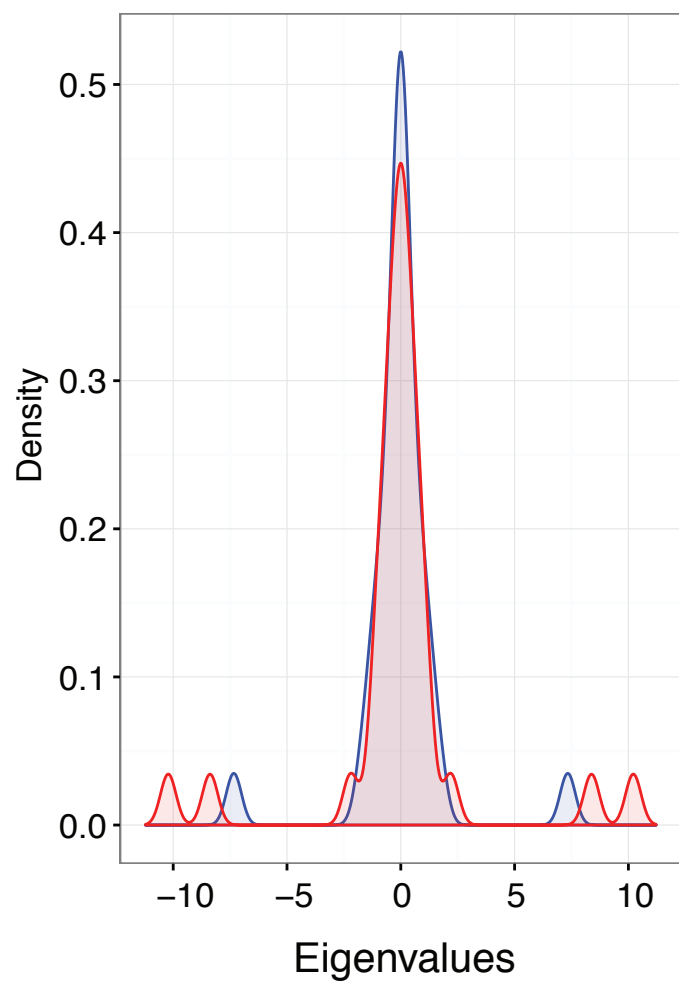

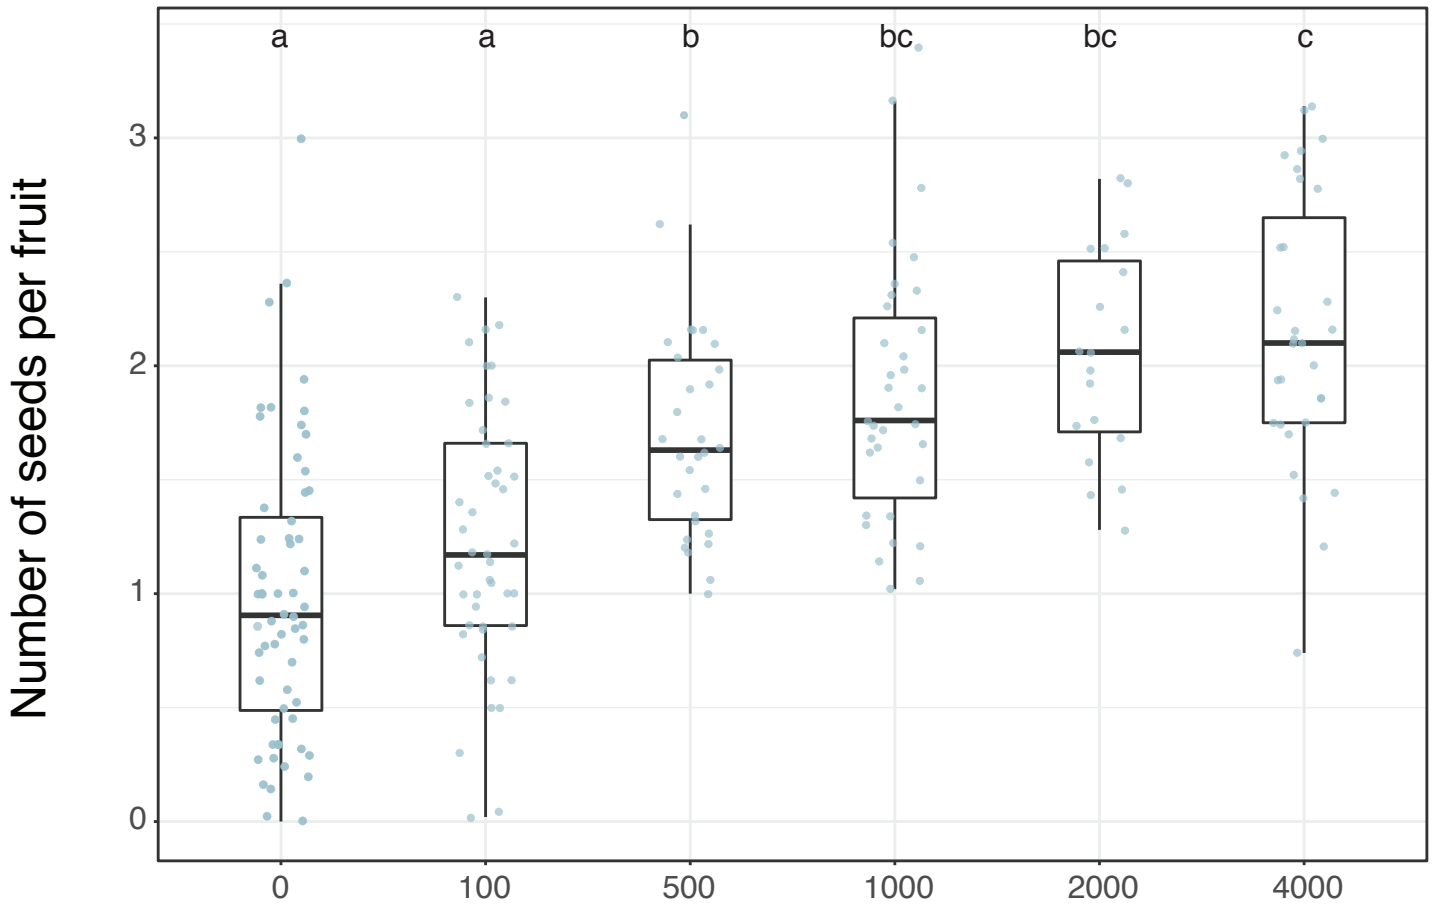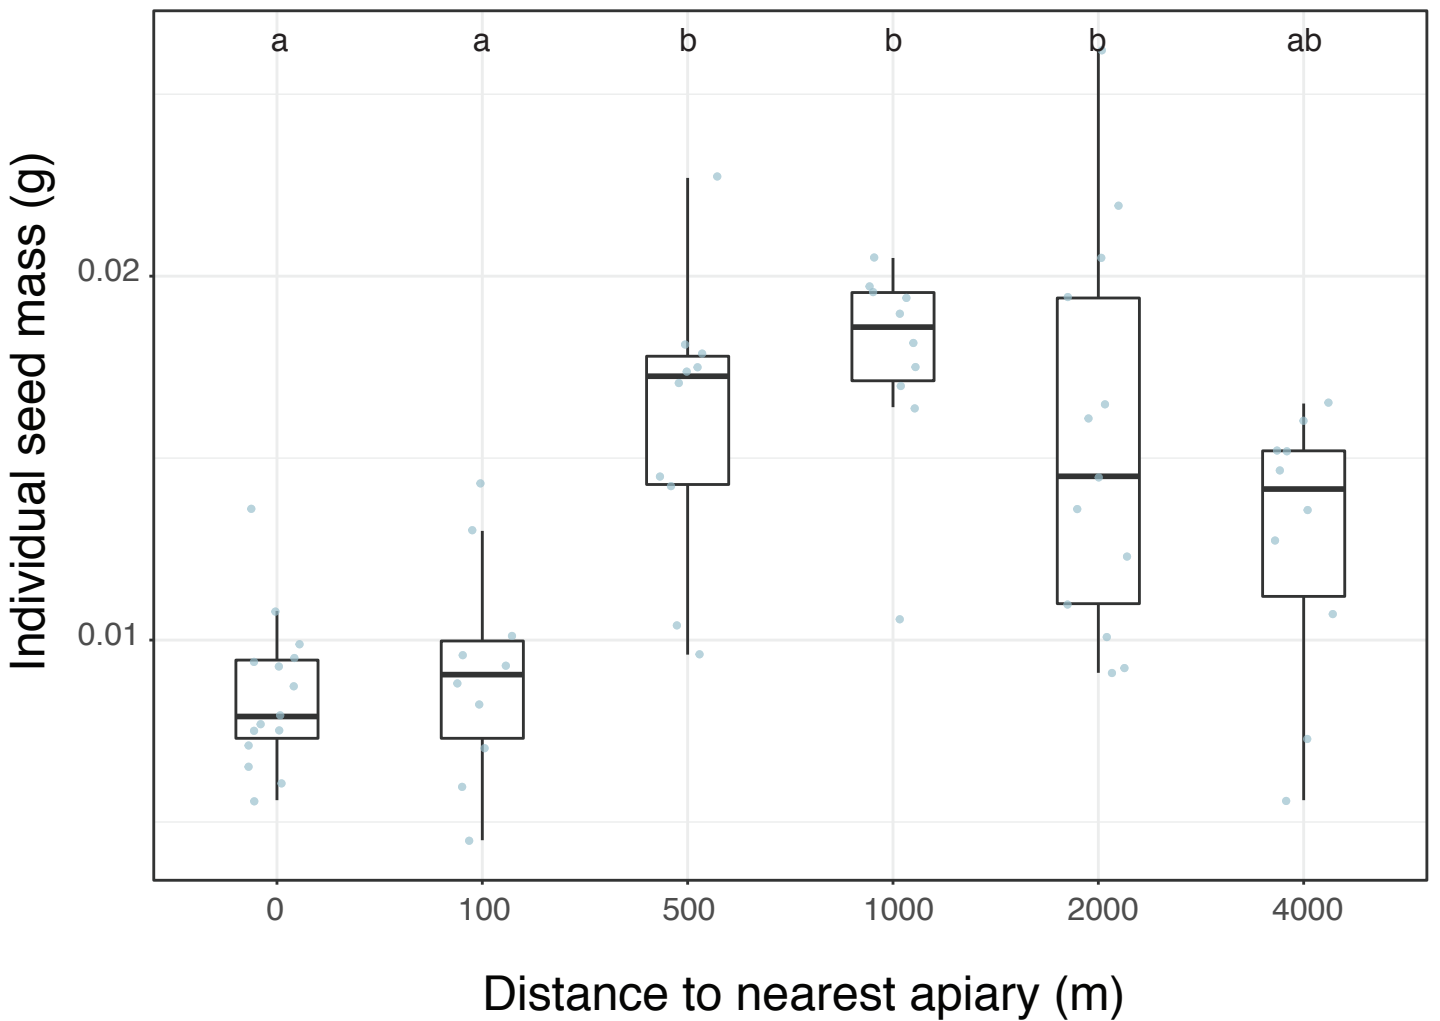



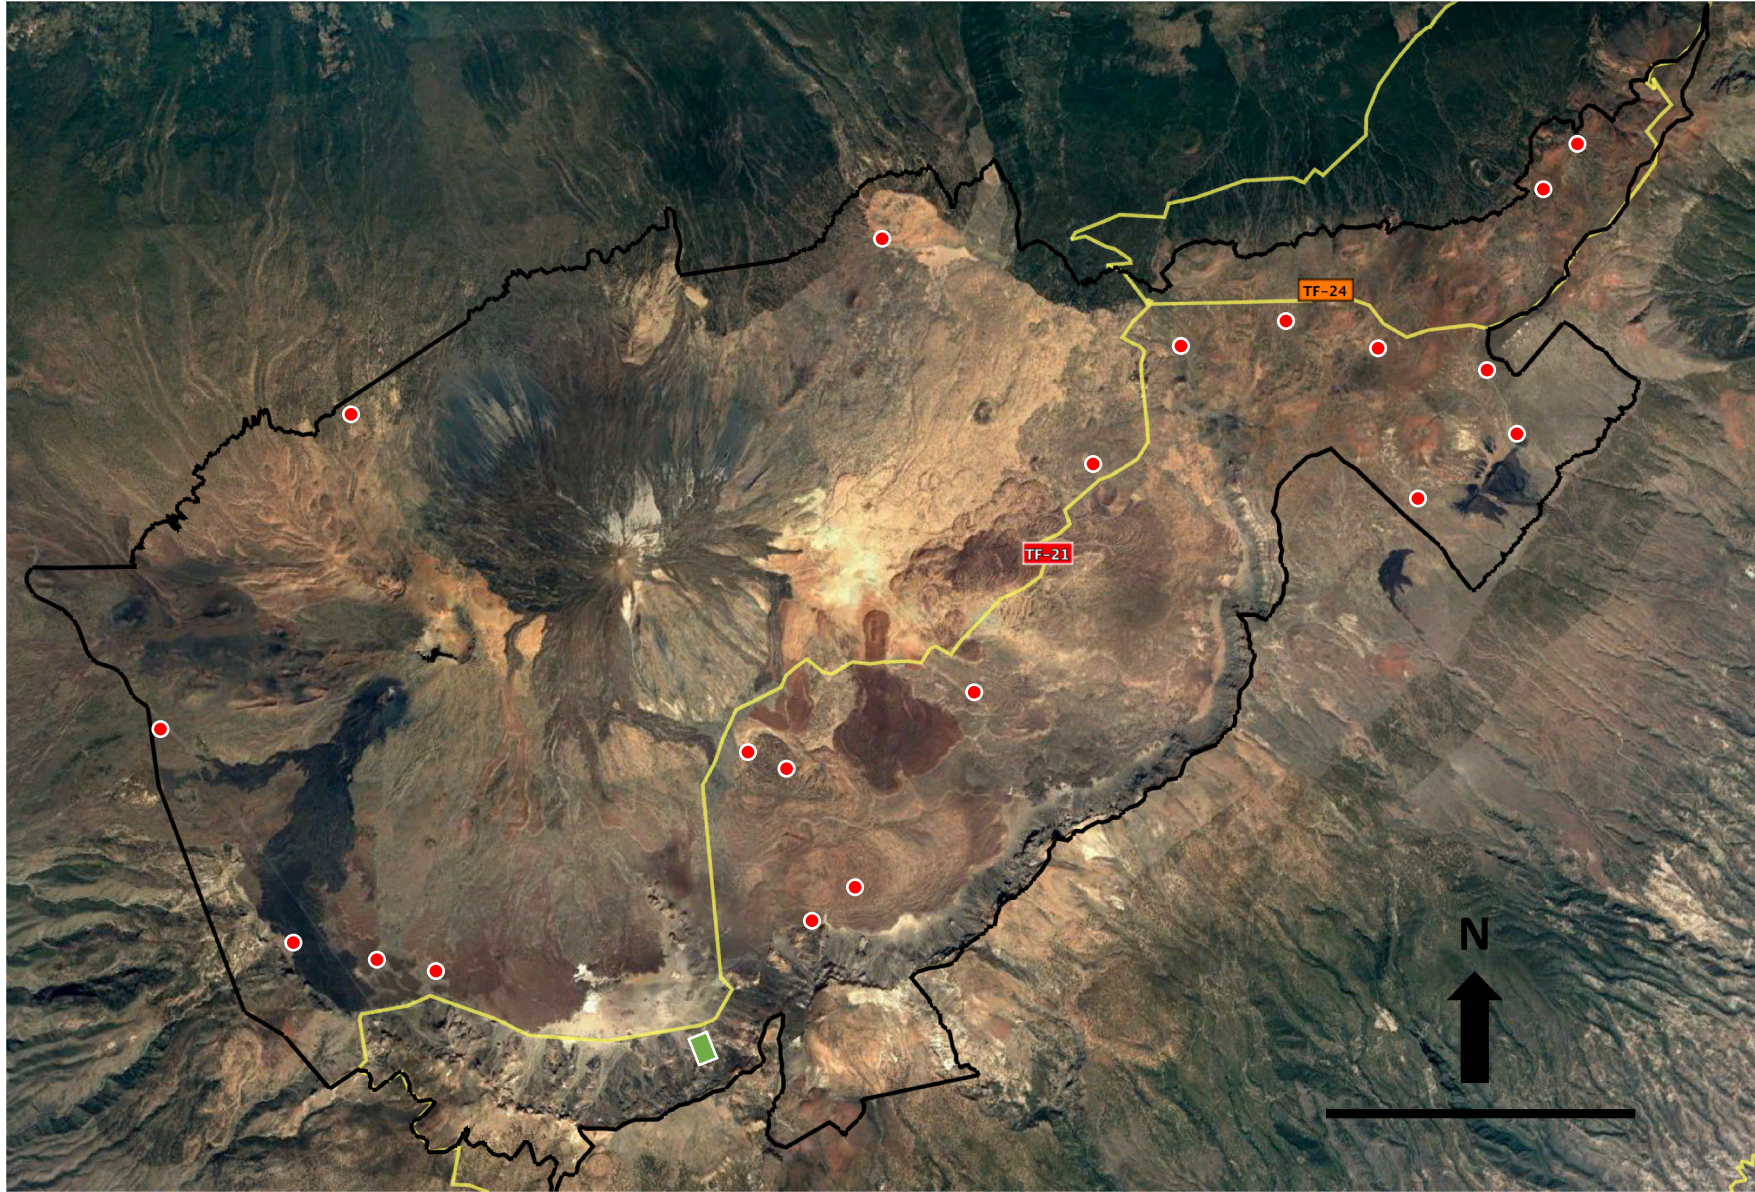

Supplement: 41598_2019_41271_MOESM1_ESM.pdf [file 41598_2019_41271_MOESM1_ESM.pdf]
